# Supplementary material for: A Comprehensive In Silico Study of New Metabolites from Heteroxenia fuscescens with SARS-CoV-2 Inhibitory Activity
Source: MDPI journal article supplement (doi:10.3390/molecules27217369), 2022-10-29
Supplement: s1 [file s1]

# **A Comprehensive In Silico Study of New Metabolites from *Heteroxenia fuscescens* with SARS-CoV-2 Inhibitory Activity**

**Fahd M. Abdelkarem <sup>1</sup>, Alaa M. Nafady <sup>1</sup>, Ahmed E. Allam <sup>1,\*</sup>, Mahmoud A. H. Mostafa <sup>1,2</sup>, Rwaida A. Al Haidari <sup>2</sup>, Heba Ali Hassan <sup>3</sup>, Magdi E. A. Zaki <sup>4,\*</sup>, Hamdy K. Assaf <sup>1</sup>, Mohamed R. Kamel <sup>1</sup>, Sabry A. H. Zidan <sup>1</sup>, Ahmed M. Elsayed <sup>5</sup> and Kuniyoshi Shimizu <sup>6</sup>**

<sup>1</sup> Department of Pharmacognosy, Faculty of Pharmacy, Al-Azhar University, Assiut 71524, Egypt

<sup>2</sup> Department of Pharmacognosy and Pharmaceutical Chemistry, College of Pharmacy, Taibah University, Al Madinah Al Munawarah 41477, Saudi Arabia

<sup>3</sup> Department of Pharmacognosy, Faculty of Pharmacy, Sohag University, Sohag 82524, Egypt

<sup>4</sup> Department of Chemistry, Faculty of Science, Imam Mohammad Ibn Saud Islamic University, Riyadh 13318, Saudi Arabia

<sup>5</sup> Department of Pharmacognosy, Faculty of Pharmacy, Nahda University, Beni-Suef 62513, Egypt

<sup>6</sup> Department of Agro-Environmental Sciences, Graduate School of Bioresource and Bioenvironmental Sciences, Kyushu University, Fukuoka 819-0395, Japan

\* Correspondence: ahmedallam@azhar.edu.eg (A.E.A.); mezaki@imamu.edu.sa (M.E.A.Z.)

**Content:**

- Table S1.**  $^1\text{H}$  NMR data of compounds **2**, **3** and **5**.  
**Table S2.**  $^1\text{H}$  NMR data of compounds **6**, **7** and **8**.  
**Table S3.**  $^{13}\text{C}$ -NMR data of compounds **2**, **3**, **5**, **6**, **7** and **8**.  
**Figure S1.** Positive HRFAB-MS spectrum of compound **1**.  
**Figure S2.**  $^1\text{H}$ -NMR spectrum of compound **1** (600 MHz,  $\text{CDCl}_3$ ).  
**Figure S3.** Expanded  $^1\text{H}$ -NMR spectrum (aromatic region) of compound **1** (600 MHz,  $\text{CDCl}_3$ ).  
**Figure S4.**  $^{13}\text{C}$ -NMR spectrum of compound **1** (150 MHz,  $\text{CDCl}_3$ ).  
**Figure S5.** HSQC spectrum of compound **1** ( $\text{CDCl}_3$ ).  
**Figure S6.** HMBC spectrum of compound **1** ( $\text{CDCl}_3$ ).  
**Figure S7.**  $^1\text{H}$ - $^1\text{H}$  COSY spectrum of compound **1** ( $\text{CDCl}_3$ ).  
**Figure S8.** Expanded  $^1\text{H}$ - $^1\text{H}$  COSY spectrum of compound **1** ( $\text{CDCl}_3$ ).  
**Figure S9.** NOESY spectrum of compound **1** ( $\text{CDCl}_3$ ).  
**Figure S10.** Expanded NOESY spectrum of compound **1** ( $\text{CDCl}_3$ ).  
**Figure S11.** Positive HR-ESI-MS spectrum of compound **4**.  
**Figure S12.**  $^1\text{H}$ -NMR spectrum of compound **4** (600 MHz,  $\text{CD}_3\text{OD}$ ).  
**Figure S13.**  $^{13}\text{C}$ -NMR spectrum of compound **4** (150 MHz,  $\text{CD}_3\text{OD}$ ).  
**Figure S14.** HSQC spectrum of compound **4** ( $\text{CD}_3\text{OD}$ ).  
**Figure S15.** HMBC spectrum of compound **4** ( $\text{CD}_3\text{OD}$ ).  
**Figure S16.**  $^1\text{H}$ - $^1\text{H}$  COSY spectrum of compound **4** ( $\text{CD}_3\text{OD}$ ).  
**Figure S17.** Expanded  $^1\text{H}$ - $^1\text{H}$  COSY spectrum of compound **4** ( $\text{CD}_3\text{OD}$ ).  
**Figure S18.** NOESY spectrum of compound **4** ( $\text{CD}_3\text{OD}$ ).  
**Figure S19.** Expanded NOESY spectrum of compound **4** ( $\text{CD}_3\text{OD}$ ).  
**Figure S20.**  $^1\text{H}$ -NMR spectrum of compound **2** (600 MHz,  $\text{CDCl}_3$ ).  
**Figure S21.**  $^{13}\text{C}$ -NMR spectrum of compound **2** (150 MHz,  $\text{CDCl}_3$ ).  
**Figure S22.**  $^1\text{H}$ -NMR spectrum of compound **3** (600 MHz,  $\text{CDCl}_3$ ).  
**Figure S23.**  $^{13}\text{C}$ -NMR spectrum of compound **3** (150 MHz,  $\text{CDCl}_3$ ).  
**Figure S24.**  $^1\text{H}$ -NMR spectrum of compound **5** (600 MHz,  $\text{CD}_3\text{OD}$ ).  
**Figure S25.**  $^{13}\text{C}$ -NMR spectrum of compound **5** (150 MHz,  $\text{CD}_3\text{OD}$ ).  
**Figure S26.**  $^1\text{H}$ -NMR spectrum of compound **6** (600 MHz,  $\text{CD}_3\text{OD}$ ).  
**Figure S27.**  $^{13}\text{C}$ -NMR spectrum of compound **6** (150 MHz,  $\text{CD}_3\text{OD}$ ).  
**Figure S28.**  $^1\text{H}$ -NMR spectrum of compound **7** (600 MHz,  $\text{CD}_3\text{OD}$ ).  
**Figure S29.**  $^{13}\text{C}$ -NMR spectrum of compound **7** (150 MHz,  $\text{CD}_3\text{OD}$ ).  
**Figure S30.**  $^1\text{H}$ -NMR spectrum of compound **8** (600 MHz,  $\text{CD}_3\text{OD}$ ).  
**Figure S31.**  $^{13}\text{C}$ -NMR spectrum of compound **8** (150 MHz,  $\text{CD}_3\text{OD}$ ).  
**Table S4.** All SARS CoV-2 related proteins used in this study.  
**Table S5.** Docking scores of the isolated compounds (**1**–**8**) against the SARS CoV-2 targets expressed in kcal/mol.

**Table S1.** <sup>1</sup>H NMR data of compounds **2**, **3** and **5**.

| Position | <b>2<sup>a</sup></b> |              |                | <b>3<sup>b</sup></b> |              |             | <b>5<sup>c</sup></b> |              |             |
|----------|----------------------|--------------|----------------|----------------------|--------------|-------------|----------------------|--------------|-------------|
|          | $\delta H$           | Multiplicity | [J in (Hz)]    | $\delta H$           | Multiplicity | [J in (Hz)] | $\delta H$           | Multiplicity | [J in (Hz)] |
| 1        | 2.65                 | dd           | 13.1, 4.3      | 1.85                 | m            | -           | 2.04                 | m            | -           |
|          |                      |              |                | 1.06                 | m            | -           | 1.76                 | m            | -           |
| 2        | 2.09                 | ddd          | 16.6, 6.9, 4.6 | 1.82                 | m            | -           | 1.72                 | m            | -           |
|          | 1.74                 | m            | -              | 1.48                 | m            | -           | 1.49                 | m            | -           |
| 3        | 4.23                 | br.d         | 7.6            | 3.52                 | m            | -           | 4.00                 | m            | -           |
| 4        | -                    | -            | -              | 2.30                 | m            | -           | 2.05                 | m            | -           |
|          |                      |              |                | 2.28                 | m            | -           | 1.53                 | m            | -           |
| 5        | 5.37                 | br.t         | 1.6            | -                    | -            | -           | -                    | -            | -           |
| 6        | -                    | -            | -              | 5.36                 | t            | 2.3         | 3.43                 | s            | -           |
| 7        | 2.49                 | dd           | 5.7, 3.2       | 1.96                 | m            | -           | 1.50                 | m            | -           |
|          |                      |              |                | 1.56                 | m            | -           |                      |              |             |
| 8        | 5.83                 | dd           | 9.7, 3.4       | 1.43                 | m            | -           | 1.28                 | m            | -           |
| 9        | 5.95                 | dd           | 9.7, 2.1       | 0.92                 | m            | -           | 1.23                 | m            | -           |
| 10       | -                    | -            | -              | -                    | -            | -           | -                    | -            | -           |
| 11       | 1.83                 | m            | -              | 1.58                 | m            | -           | 3.81                 | td           | 10.6, 4.8   |
| 12       | 1.00                 | d            | 7.0            | 2.02                 | m            | -           | 2.27                 | dd           | 12.2, 4.9   |
|          |                      |              |                | 1.17                 | m            | -           | 1.43                 | m            | -           |
| 13       | 0.73                 | d            | 7.0            | -                    | -            | -           | -                    | -            | -           |
| 14       | 1.32                 | s            | -              | 0.97                 | m            | -           | 1.16                 | m            | -           |
| 15       | 1.88                 | d            | 1.2            | 1.08                 | m            | -           | 1.58                 | m            | -           |
|          |                      |              |                |                      |              |             | 1.08                 | m            | -           |
| 16       |                      |              |                | 1.98                 | m            | -           | 2.08                 | m            | -           |
|          |                      |              |                | 1.30                 | m            | -           | 1.36                 | m            | -           |
| 17       |                      |              |                | 1.21                 | m            | -           | 1.29                 | m            | -           |
| 18       |                      |              |                | 0.66                 | s            | -           | 0.71                 | s            | -           |
| 19       |                      |              |                | 1.03                 | s            | -           | 1.26                 | s            | -           |

|    |       |    |          |       |    |          |
|----|-------|----|----------|-------|----|----------|
| 20 | 1.00  | m  | -        | 1.03  | m  | -        |
| 21 | 0.94  | s  | -        | 1.05  | s  | -        |
| 22 | 0.16  | m  | -        | 0.18  | m  | -        |
| 23 | -     | -  | -        | -     | -  | -        |
| 24 | 0.24  | dq | 9.0, 7.2 | 0.25  | m  | -        |
| 25 | 1.54  | m  | -        | 1.56  | m  | -        |
| 26 | 0.86  | d  | 6.6      | 0.88  | d  | 6.5      |
| 27 | 0.96  | d  | 6.6      | 0.97  | d  | 6.7      |
| 28 | 0.94  | d  | 6.6      | 0.96  | d  | 6.7      |
| 29 | 0.92  | s  | -        | 0.92  | s  | -        |
| 30 | 0.46  | dd | 9.1, 4.3 | 0.48  | dd | 9.1, 4.3 |
|    | -0.13 | dd | 5.6, 4.6 | -0.10 | dd | 5.3, 4.9 |

<sup>a,b</sup>Measured in CDCl<sub>3</sub>, <sup>1</sup>H NMR (600 MHz), <sup>c</sup>Measured in CD<sub>3</sub>OD, <sup>1</sup>H NMR (600 MHz).

**Table S2.** <sup>1</sup>H NMR data of compounds **6**, **7** and **8**.

| Position | 6 <sup>a</sup> |              |             | 7 <sup>a</sup> |              |             | 8 <sup>a</sup> |              |             |
|----------|----------------|--------------|-------------|----------------|--------------|-------------|----------------|--------------|-------------|
|          | $\delta H$     | Multiplicity | [J in (Hz)] | $\delta H$     | Multiplicity | [J in (Hz)] | $\delta H$     | Multiplicity | [J in (Hz)] |
| 1        | 1.85           | m            | -           | 1.90           | mm           | -           | 1.73           | mm           | -           |
|          | 1.13           | m            | -           | 1.46           |              | -           | 1.23           |              | -           |
| 2        | 1.72           | m            | -           | 1.73           | mm           | -           | 1.95           | mm           | -           |
|          | 1.46           | m            | -           | 1.49           |              | -           | 1.49           |              | -           |
| 3        | 3.97           | m            | -           | 3.98           | m            | -           | 4.01           | m            | -           |
| 4        | 2.01           | m            | -           | 2.05           | mm           | -           | 2.05           | mm           | -           |
|          | 1.53           | m            | -           | 1.54           |              | -           | 1.58           |              | -           |
| 5        | -              | -            | -           | -              | -            | -           | -              | -            | -           |
| 6        | 3.43           | br.s         | -           | 3.44           | br.s         | -           | 3.43           | br.s         | -           |
| 7        | 1.78           | m            | -           | 1.79           | mm           | -           | 1.82           | mm           | -           |
|          | 1.54           | m            | -           | 1.42           |              | -           | 1.63           |              | -           |
| 8        | 1.84           | m            | -           | 1.88           | m            | -           | 1.77           | m            | -           |
| 9        | 1.86           | m            | -           | 1.43           | m            | -           | 1.45           | m            | -           |
| 10       | -              | -            | -           | -              | -            | -           | -              | -            | -           |
| 11       | 5.12           | td           | 10.6, 4.8   | 3.86           | td           | 10.6, 5.1   | 1.54           | mm           | -           |
|          |                |              |             |                |              |             | 1.37           |              | -           |
| 12       | 2.27           | m            | -           | 2.28           | ddm          | 12.0, 5.4   | 1.34           | mm           | -           |
|          | 1.17           | m            | -           | 1.52           |              | -           | 1.63           |              | -           |
| 13       | -              | -            | -           | -              | -            | -           | -              | -            | -           |
| 14       | 1.21           | m            | -           | -              | -            | -           | 1.38           | m            | -           |
| 15       | 1.62           | m            | -           | 3.38           | s            | -           | 1.56           | mm           | -           |
|          | 1.09           | m            | -           |                |              |             | 1.93           |              | -           |
| 16       | 1.37           | m            | -           | 1.78           | m            | -           | 2.44           | ddm          | 19.3, 8.6   |
|          | 1.35           | m            | -           |                |              |             | 2.09           |              | -           |
| 17       | 1.33           | m            | -           | 1.38           | m            | -           | -              | -            | -           |
| 18       | 0.73           | s            | -           | 1.03           | s            | -           | 0.88           | s            | -           |

|           |             |          |          |             |          |          |             |          |          |
|-----------|-------------|----------|----------|-------------|----------|----------|-------------|----------|----------|
| <b>19</b> | <b>1.23</b> | <b>s</b> | <b>-</b> | <b>1.25</b> | <b>s</b> | <b>-</b> | <b>1.18</b> | <b>s</b> | <b>-</b> |
| 20        | 1.04        | m        | -        | -           | -        | -        |             |          |          |
| 21        | 1.00        | s        | -        | 1.23        | s        | -        |             |          |          |
| 22        | 0.19        | m        | -        | 1.70        | mm       | -        |             |          |          |
|           |             |          |          | 1.45        |          | -        |             |          |          |
| 23        | -           | -        | -        | 2.07        | m        | -        |             |          |          |
| 24        | 0.25        | dq       | 9.0, 6.0 | 1.18        | m        | -        |             |          |          |
| 25        | 1.56        | m        | -        | 1.42        | m        | -        |             |          |          |
| 26        | 0.88        | d        | 6.6      | 0.89        | d        | 6.6      |             |          |          |
| 27        | 0.96        | d        | 6.6      | 0.92        | d        | 6.6      |             |          |          |
| 28        | 0.98        | d        | 6.6      | 0.78        | d        | 6.6      |             |          |          |
| 29        | 0.92        | s        | -        | 0.83        | d        | 6.9      |             |          |          |
| 30        | 0.48        | dd       | 9.0, 6.0 |             |          |          |             |          |          |
|           | - 0.11      | dd       | 6.0, 4.0 |             |          |          |             |          |          |
| 1'        | -           | -        | -        |             |          |          |             |          |          |
| 2'        | 2.00        | s        | -        |             |          |          |             |          |          |

<sup>a</sup>Measured in CD<sub>3</sub>OD, <sup>1</sup>H NMR (600 MHz).

**Table S3.** <sup>13</sup>C-NMR data of compounds **2**, **3**, **5**, **6**, **7** and **8**.

| Position | <b>2<sup>a</sup></b> | <b>3<sup>b</sup></b> | <b>5<sup>c</sup></b> | <b>6<sup>c</sup></b> | <b>7<sup>c</sup></b> | <b>8<sup>c</sup></b> |
|----------|----------------------|----------------------|----------------------|----------------------|----------------------|----------------------|
|          | $\delta C$           |
| 1        | 49.7                 | 37.3                 | 35.2                 | 35.1                 | 35.1                 | 33.0                 |
| 2        | 29.9                 | 31.7                 | 32.1                 | 32.1                 | 32.1                 | 31.7                 |
| 3        | 69.9                 | 71.8                 | 68.3                 | 67.9                 | 68.2                 | 68.3                 |
| 4        | 144.2                | 42.3                 | 42.0                 | 41.9                 | 41.9                 | 41.5                 |
| 5        | 120.6                | 140.8                | 77.5                 | 77.2                 | 77.4                 | 76.8                 |
| 6        | 84.5                 | 121.7                | 76.8                 | 76.5                 | 76.6                 | 76.3                 |
| 7        | 53.6                 | 31.8                 | 35.4                 | 35.5                 | 35.3                 | 34.2                 |
| 8        | 129.3                | 32.0                 | 30.4                 | 30.7                 | 28.4                 | 31.4                 |
| 9        | 134.5                | 50.2                 | 53.1                 | 49.0                 | 53.7                 | 46.9                 |
| 10       | 81.9                 | 36.5                 | 41.01                | 40.9                 | 41.3                 | 39.6                 |
| 11       | 28.1                 | 24.6                 | 69.7                 | 73.0                 | 69.2                 | 21.6                 |
| 12       | 18.6                 | 39.0                 | 53.0                 | 47.7                 | 46.8                 | 33.6                 |
| 13       | 22.5                 | 42.8                 | 44.8                 | 44.5                 | 44.3                 | 49.1                 |
| 14       | 15.7                 | 56.7                 | 56.6                 | 56.0                 | 74.6                 | 52.5                 |
| 15       | 18.8                 | 24.6                 | 25.5                 | 25.4                 | 60.1                 | 22.8                 |
| 16       |                      | 28.2                 | 29.7                 | 29.7                 | 28.0                 | 36.8                 |
| 17       |                      | 58.0                 | 59.6                 | 59.3                 | 46.7                 | 224.2                |
| 18       |                      | 11.9                 | 13.6                 | 13.1                 | 18.3                 | 14.3                 |
| 19       |                      | 19.4                 | 17.6                 | 17.4                 | 17.5                 | 17.3                 |
| 20       |                      | 35.3                 | 36.7                 | 36.5                 | 75.6                 |                      |
| 21       |                      | 21.2                 | 21.6                 | 21.2                 | 27.1                 |                      |
| 22       |                      | 32.1                 | 33.4                 | 33.4                 | 48.8                 |                      |
| 23       |                      | 25.8                 | 26.8                 | 26.8                 | 30.2                 |                      |
| 24       |                      | 50.8                 | 52.2                 | 52.3                 | 46.8                 |                      |
| 25       |                      | 32.2                 | 33.3                 | 33.3                 | 32.2                 |                      |
| 26       |                      | 21.7                 | 22.0                 | 22.2                 | 21.8                 |                      |

|    |      |      |      |      |
|----|------|------|------|------|
| 27 | 22.2 | 22.7 | 22.1 | 21.6 |
|----|------|------|------|------|

|    |      |      |       |      |
|----|------|------|-------|------|
| 28 | 15.4 | 16.0 | 16.0  | 11.9 |
| 29 | 14.3 | 14.7 | 14.7  | 15.9 |
| 30 | 21.3 | 22.3 | 22.2  |      |
| 1' |      |      | 22.0  |      |
| 2' |      |      | 172.6 |      |

<sup>a,b</sup>Measured in CDCl<sub>3</sub>, <sup>1</sup>H NMR (600 MHz), <sup>c</sup>Measured in CD<sub>3</sub>OD, <sup>1</sup>H NMR (600 MHz).

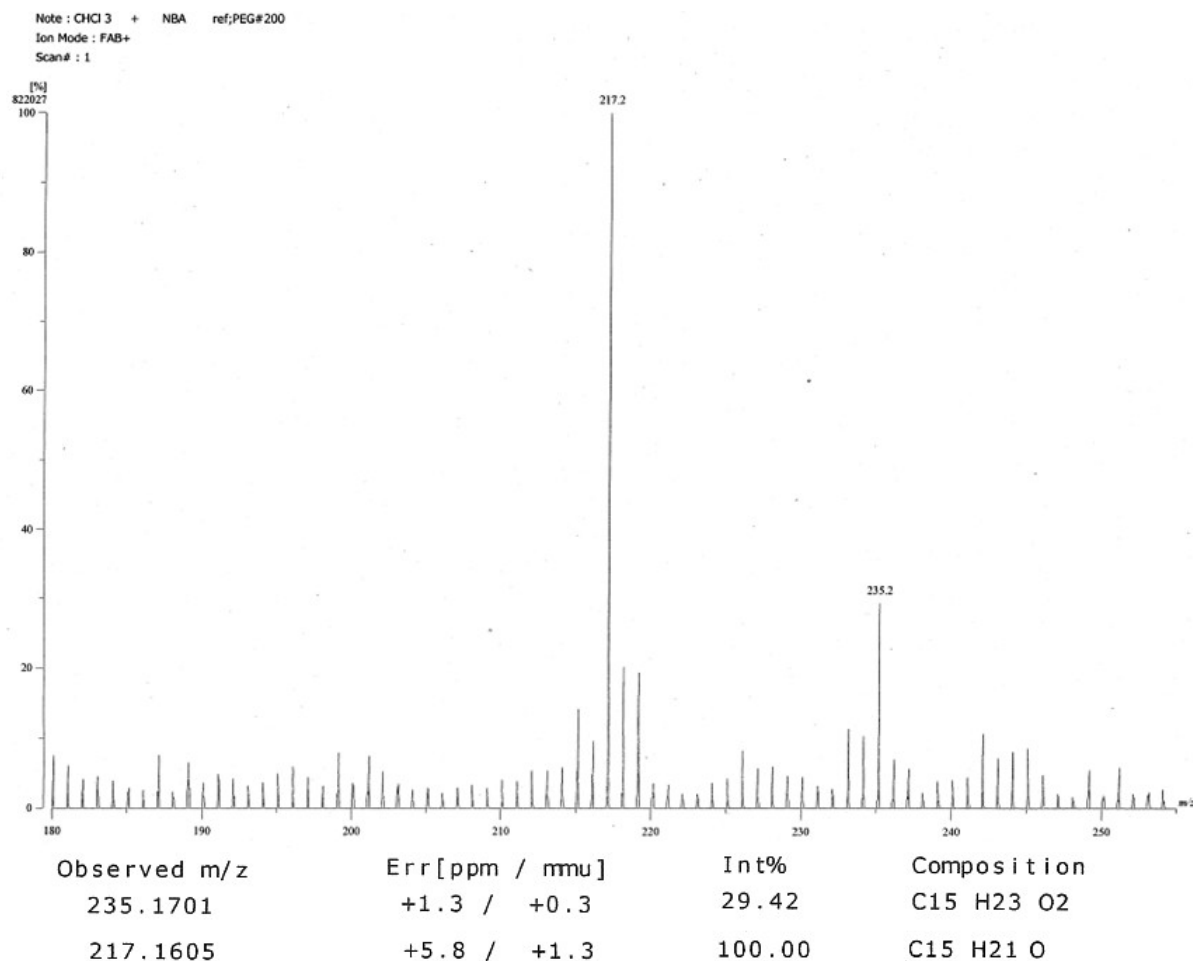

**Figure S1.** Positive HR-FAB-MS spectrum of compound **1**.

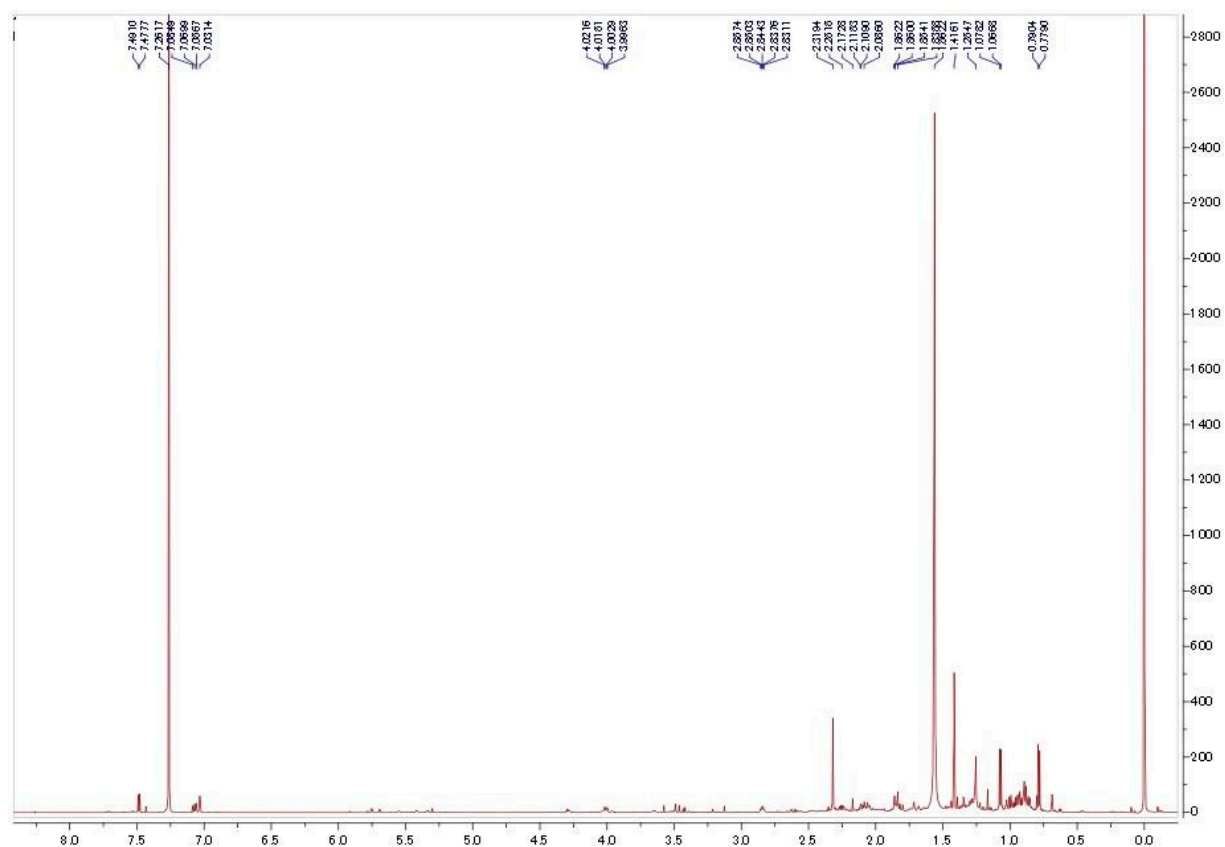

**Figure S2.**  $^1\text{H}$ -NMR spectrum of compound **1** (600 MHz,  $\text{CDCl}_3$ ).



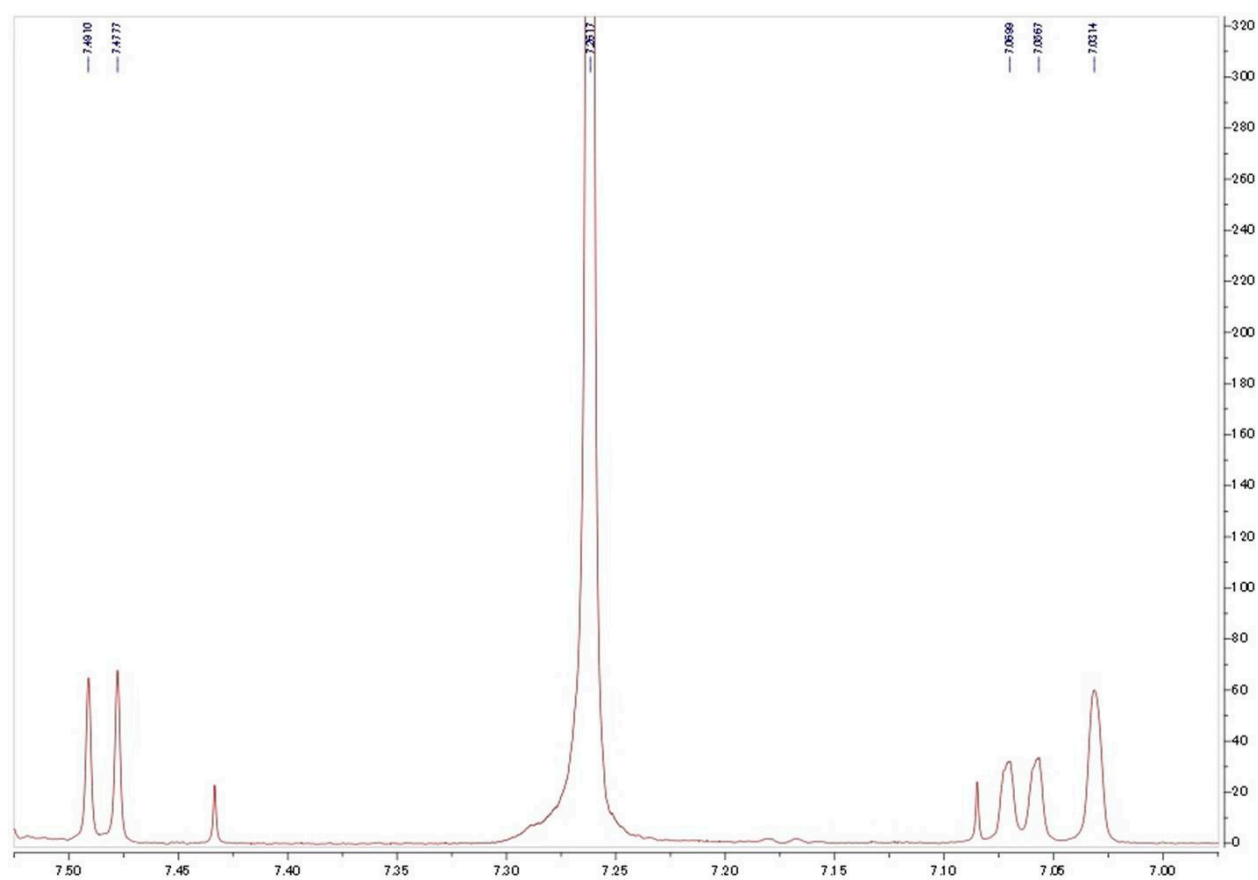

**Figure S3.** Expanded  $^1\text{H}$ -NMR spectrum (aromatic region) of compound **1** (600 MHz,  $\text{CDCl}_3$ ).

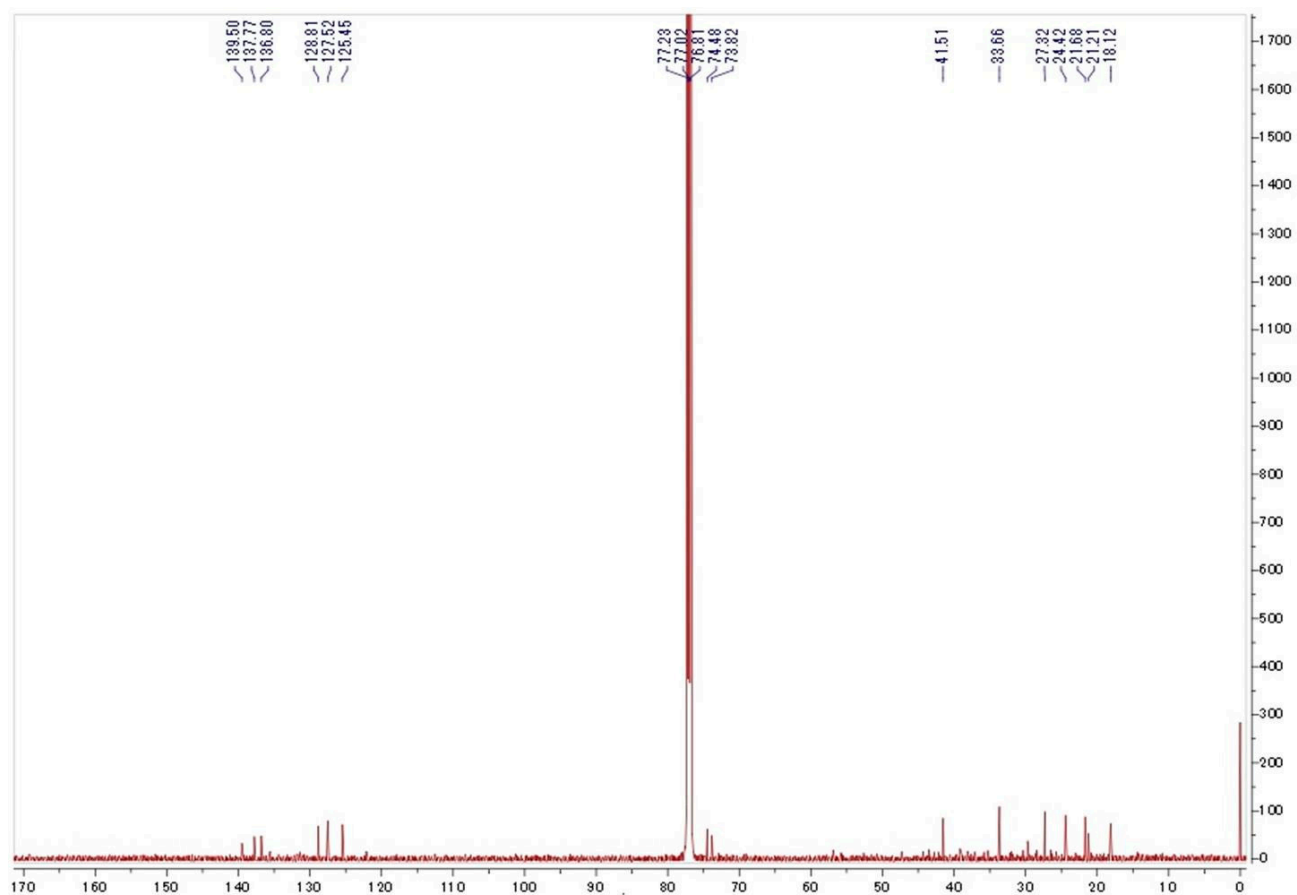

**Figure S4.**  $^{13}\text{C}$ -NMR spectrum of compound **1** (150 MHz,  $\text{CDCl}_3$ ).

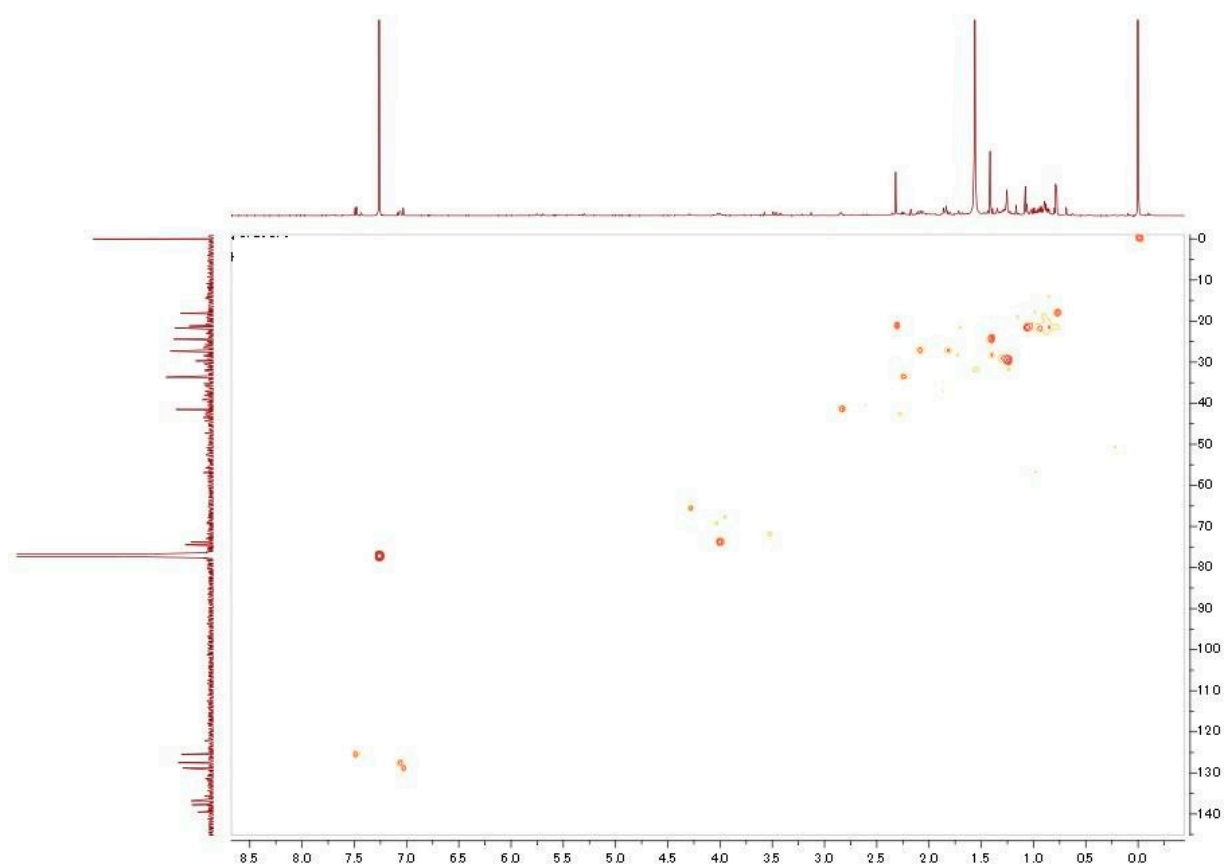

**Figure S5.** HSQC spectrum of compound **1** (CDCl<sub>3</sub>).

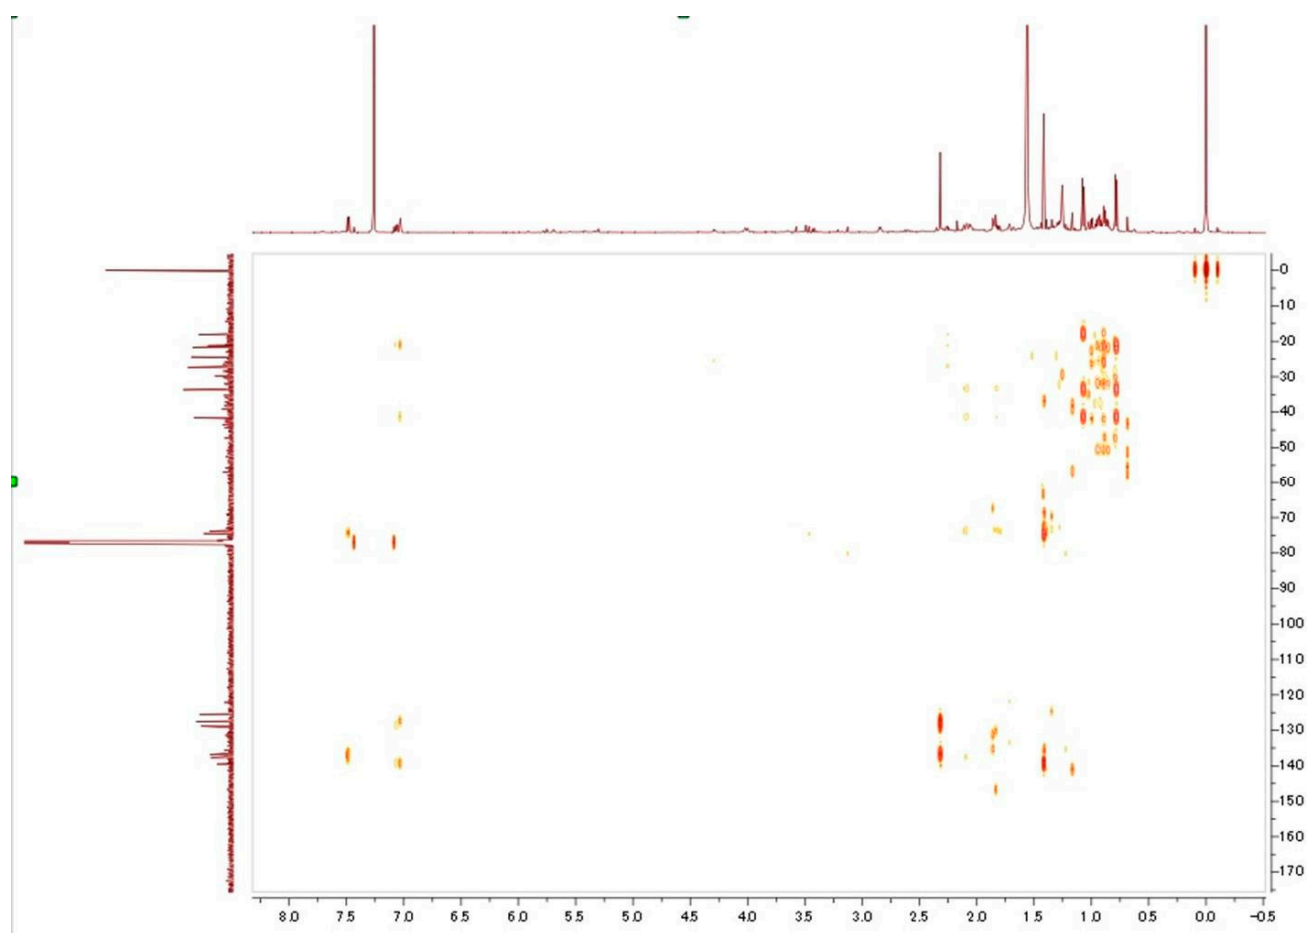

**Figure S6.** HMBC spectrum of compound **1** (CDCl<sub>3</sub>).

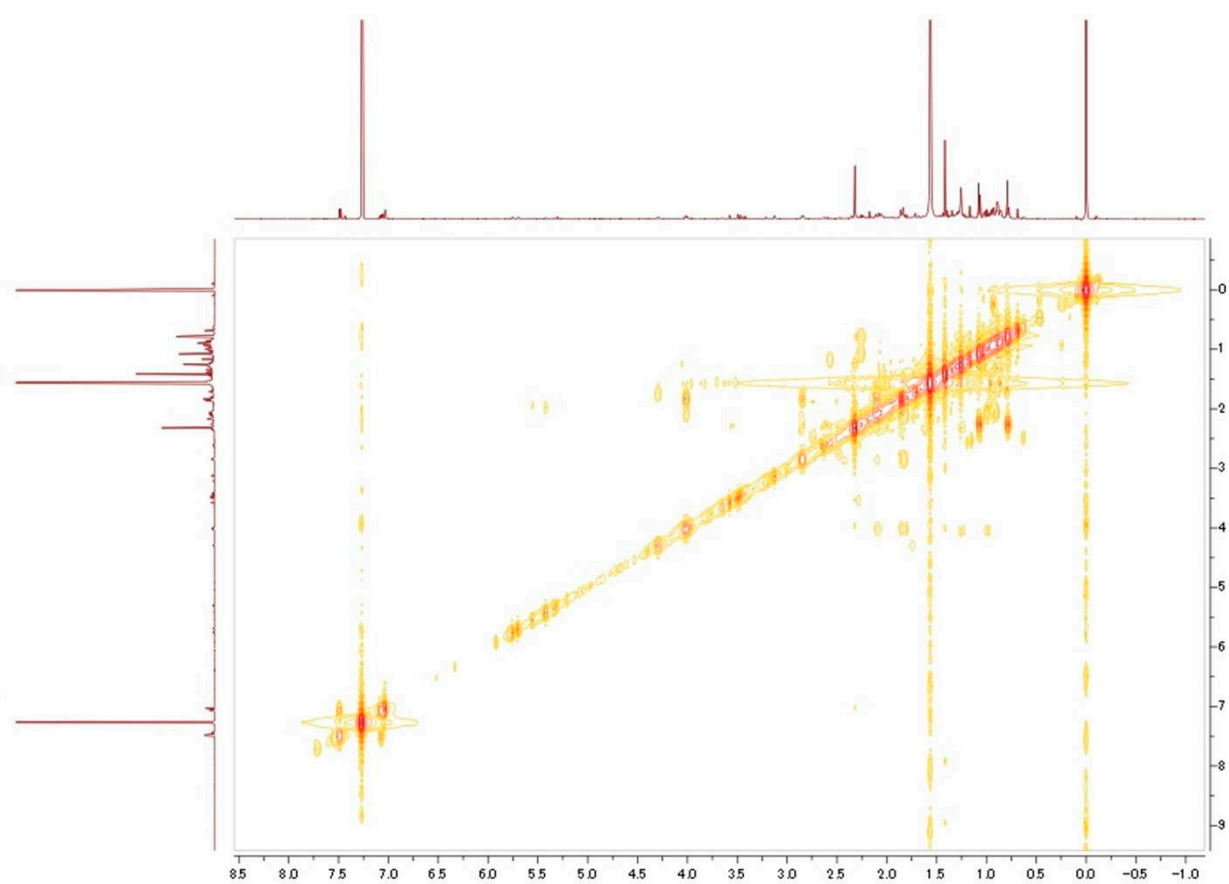

**Figure S7.**  $^1\text{H}$ - $^1\text{H}$  COSY spectrum of compound **1** ( $\text{CDCl}_3$ ).

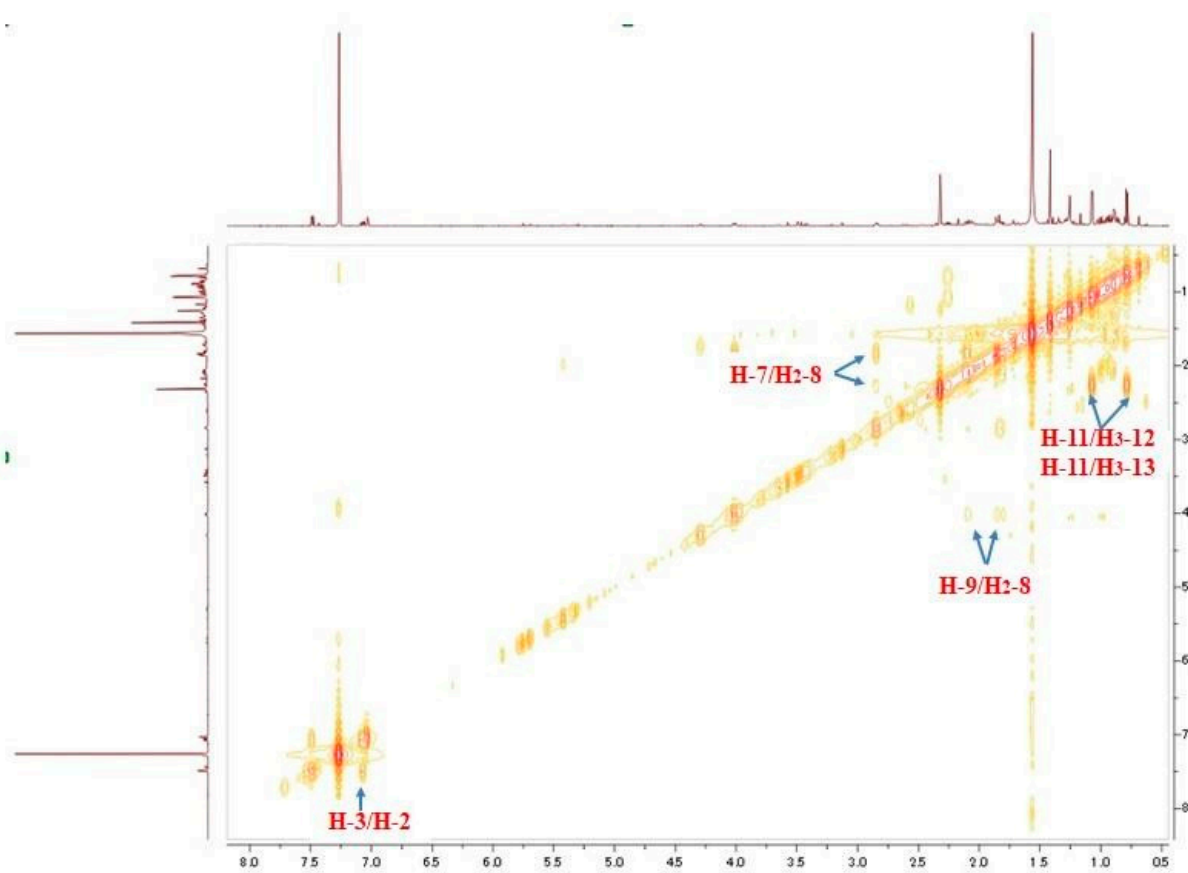

**Figure S8.** Expanded  $^1\text{H}$ - $^1\text{H}$  COSY spectrum of compound **1** ( $\text{CDCl}_3$ ).

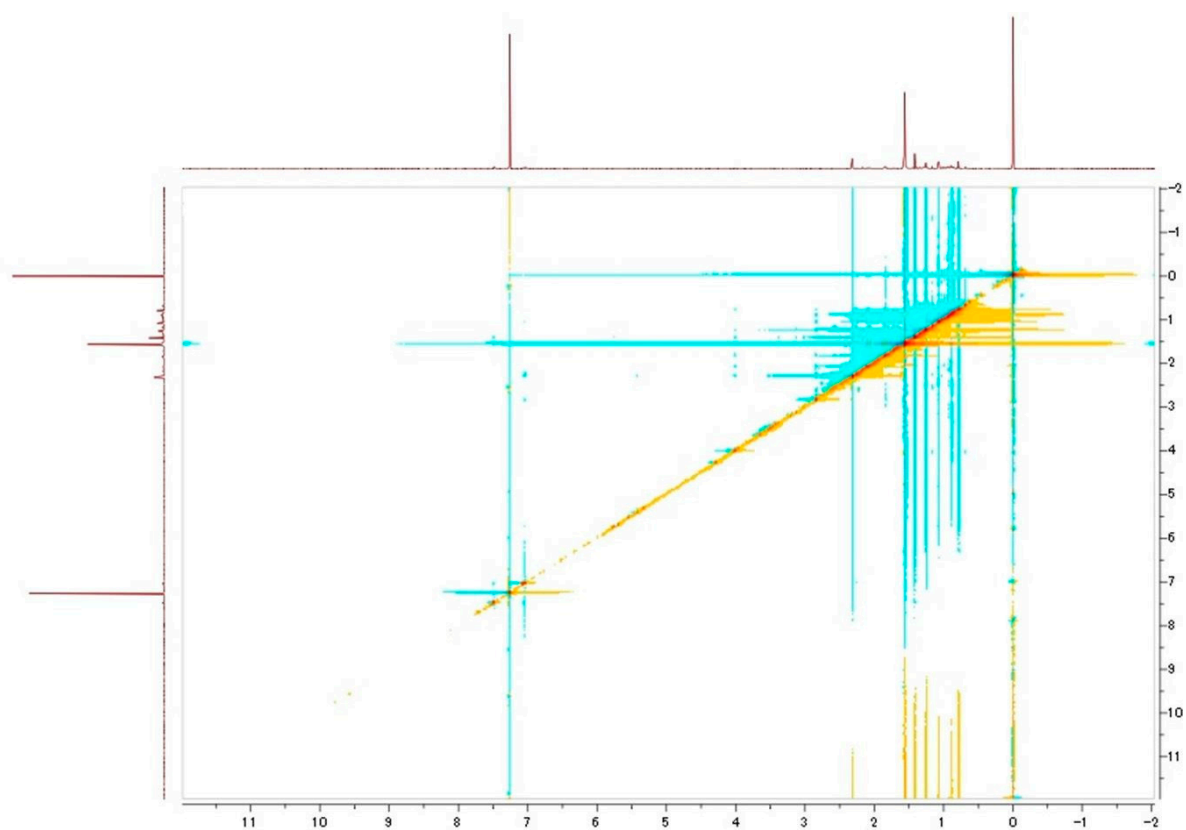

**Figure S9.** NOESY spectrum of compound **1** (CDCl<sub>3</sub>).

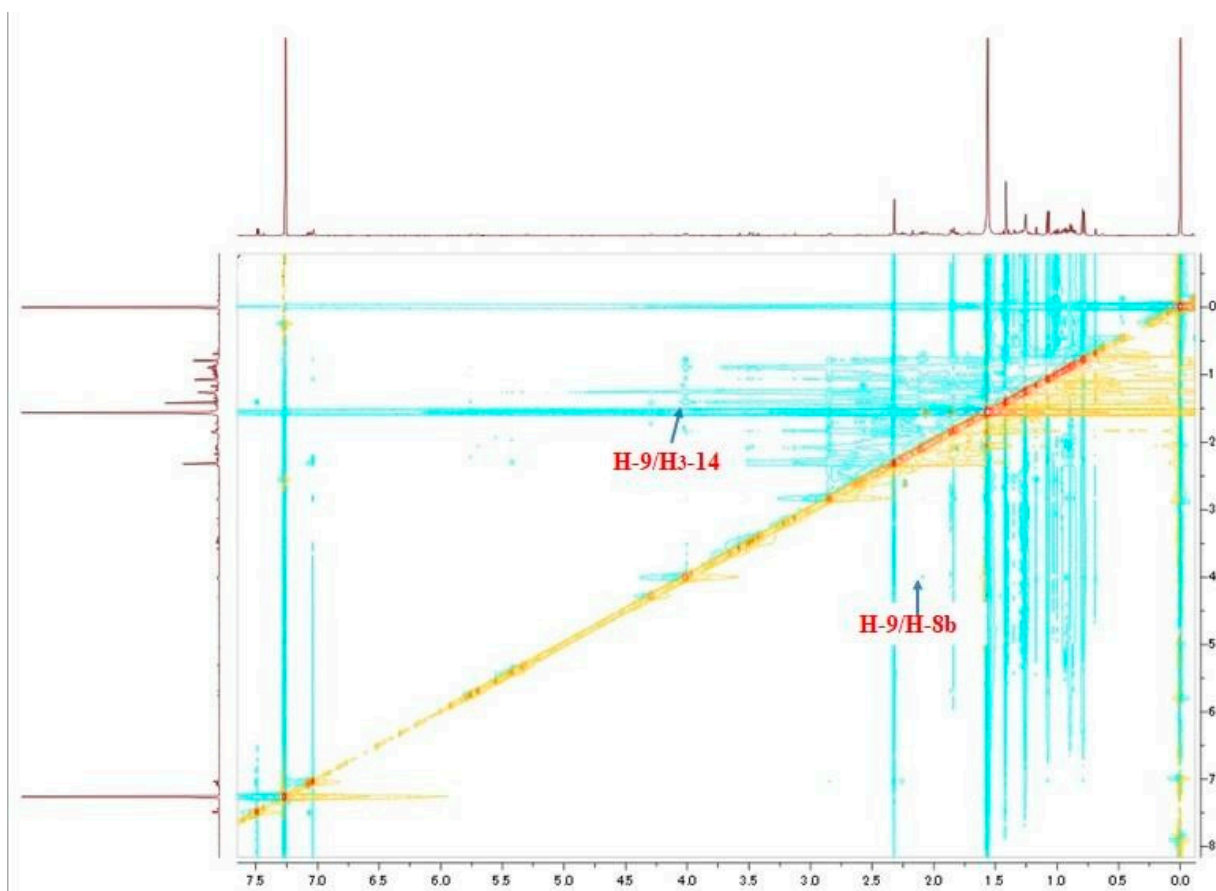

**Figure S10.** Expanded NOESY spectrum of compound **1** (CDCl<sub>3</sub>).



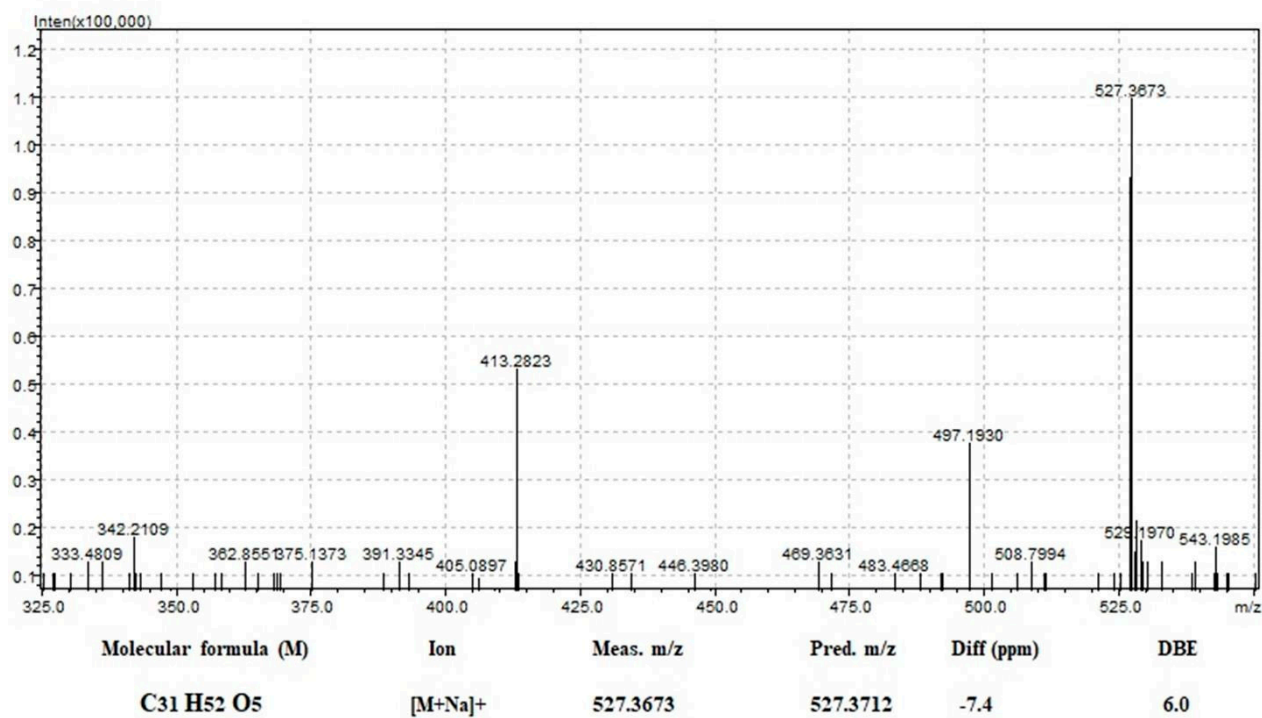

Figure S11. Positive HR-ESI-MS spectrum of compound 4.

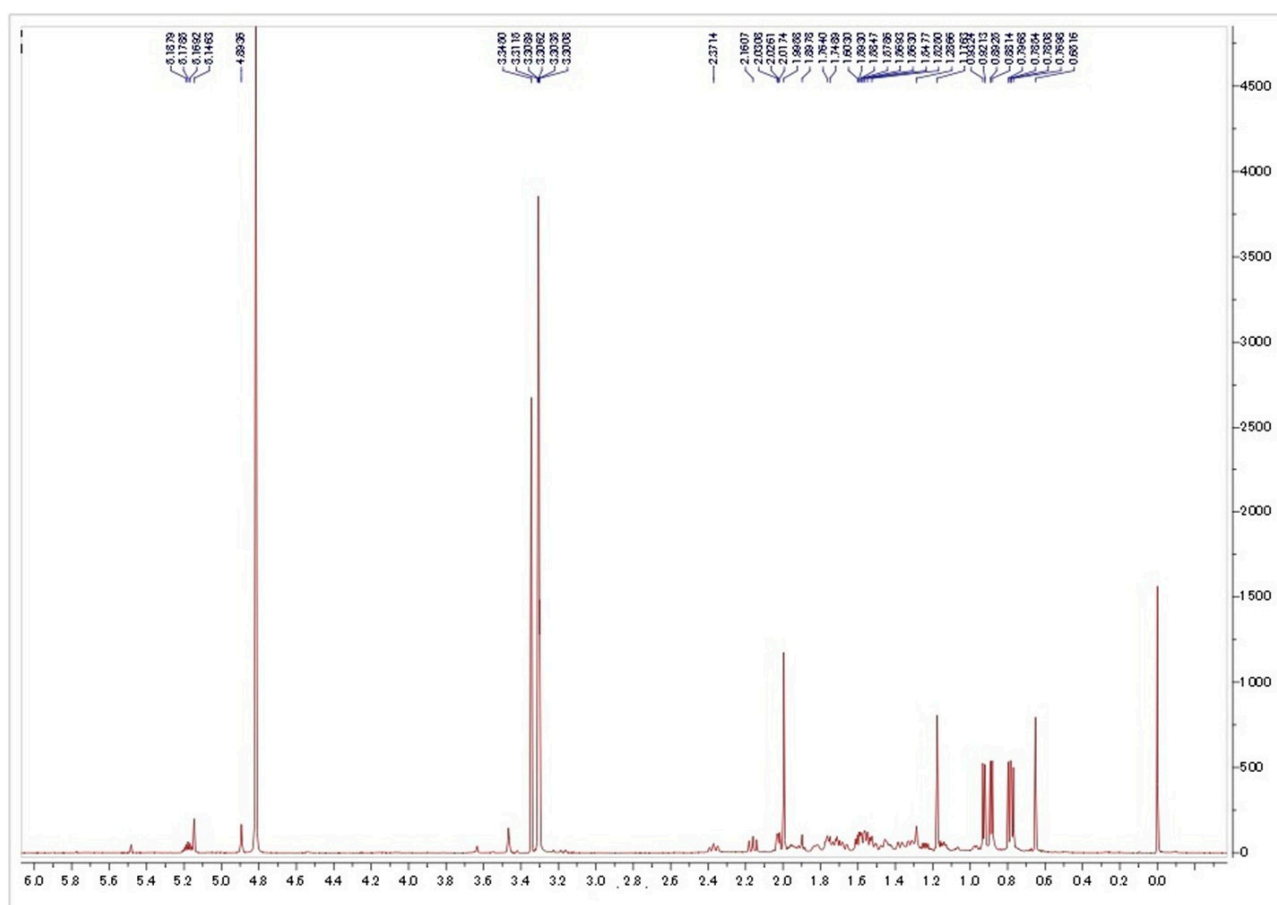

**Figure S12.**  $^1\text{H}$ -NMR spectrum of compound 4 (600 MHz,  $\text{CD}_3\text{OD}$ ).

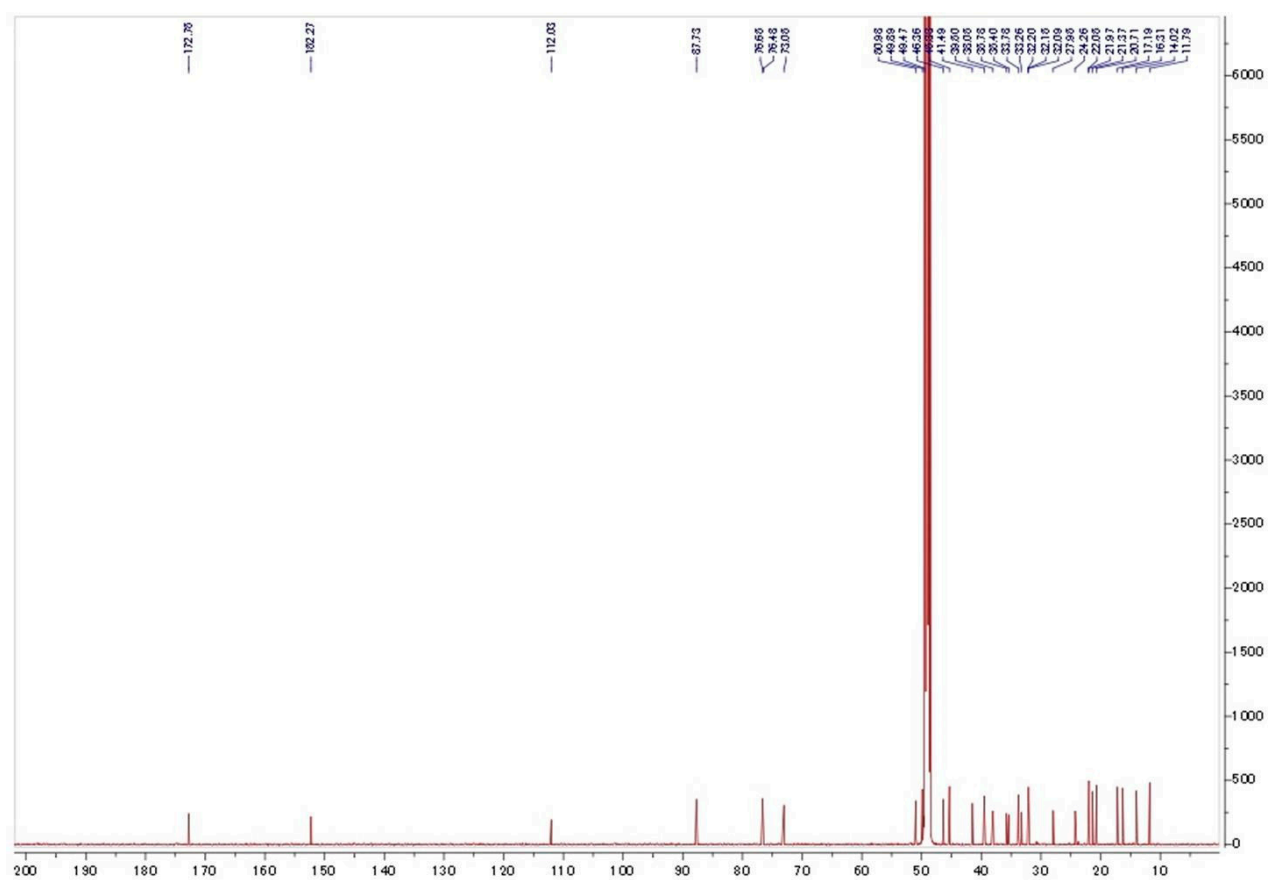

**Figure S13.**  $^{13}\text{C}$ -NMR spectrum of compound **4** (150 MHz,  $\text{CD}_3\text{OD}$ ).

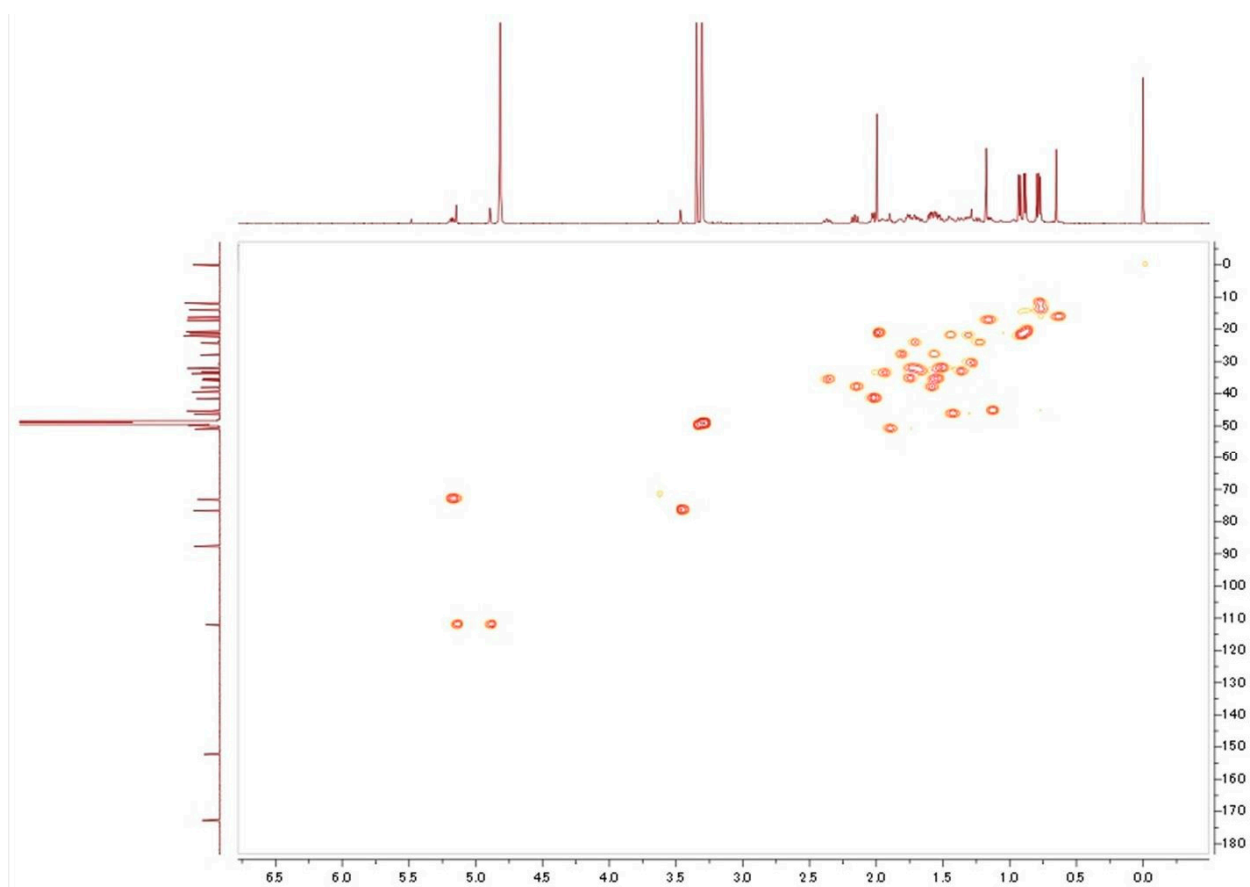

**Figure S14.** HSQC spectrum of compound **4** (CD<sub>3</sub>OD).

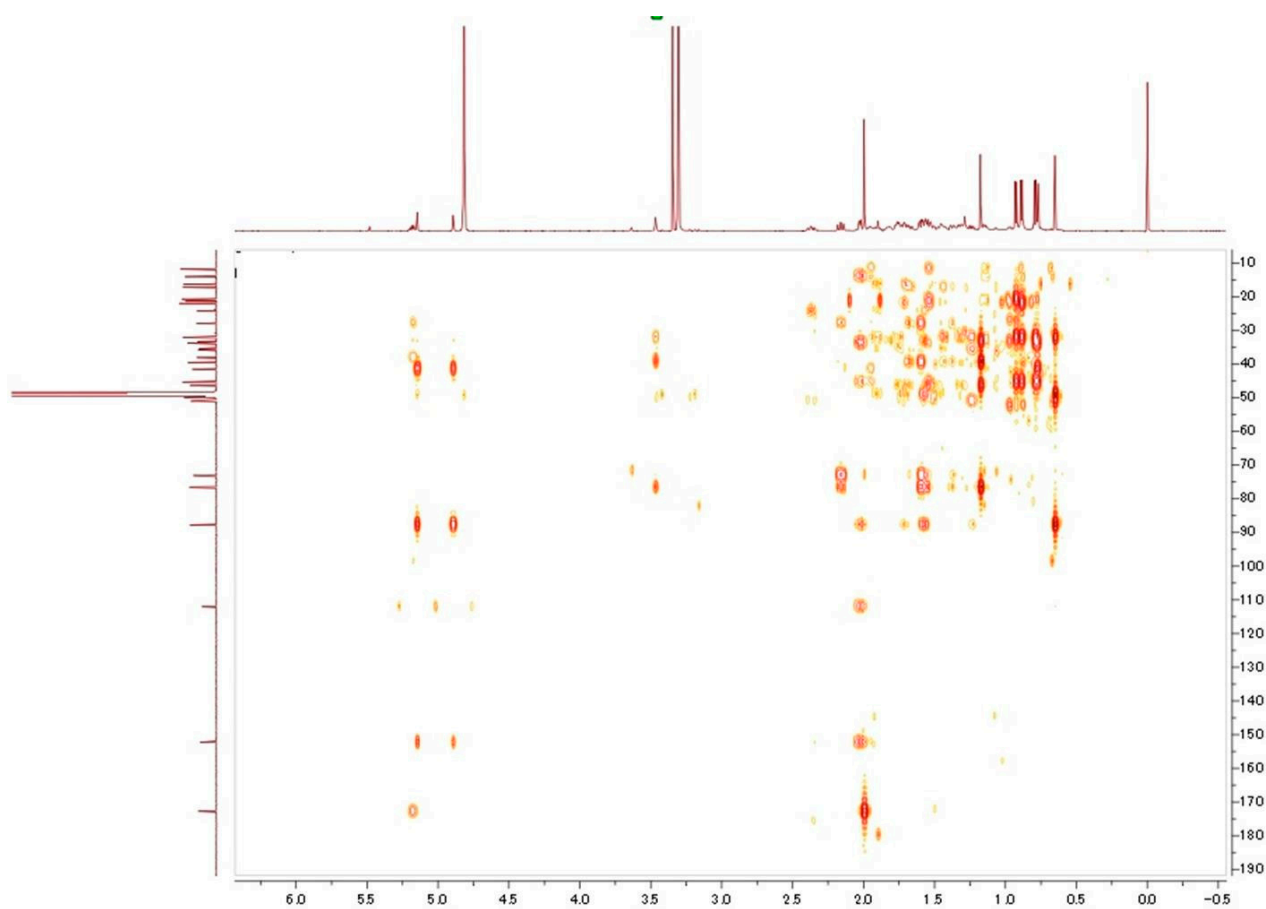

**Figure S15.** HMBC spectrum of compound **4** (CD<sub>3</sub>OD).

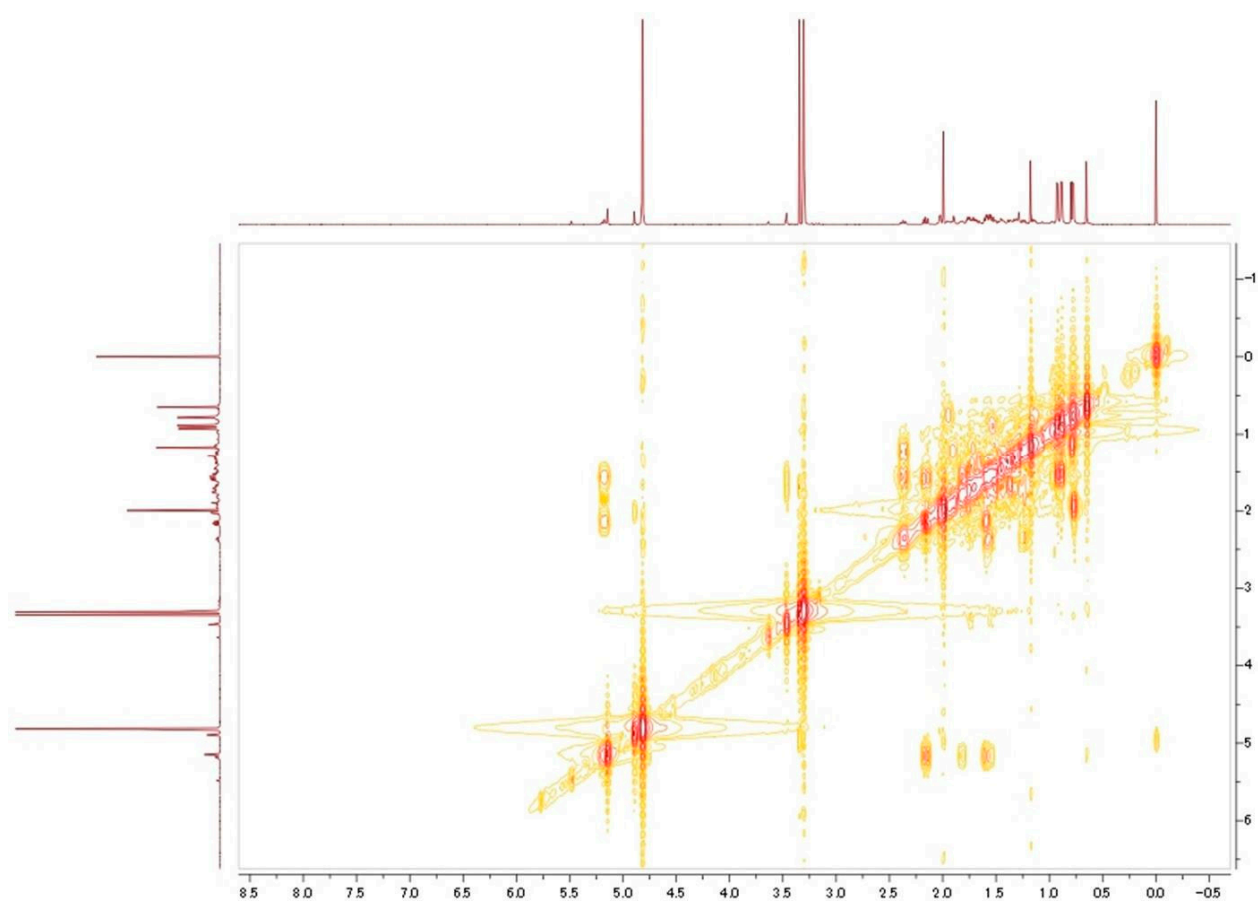

**Figure S16.**  $^1\text{H}$ - $^1\text{H}$  COSY spectrum of compound **4** ( $\text{CD}_3\text{OD}$ ).

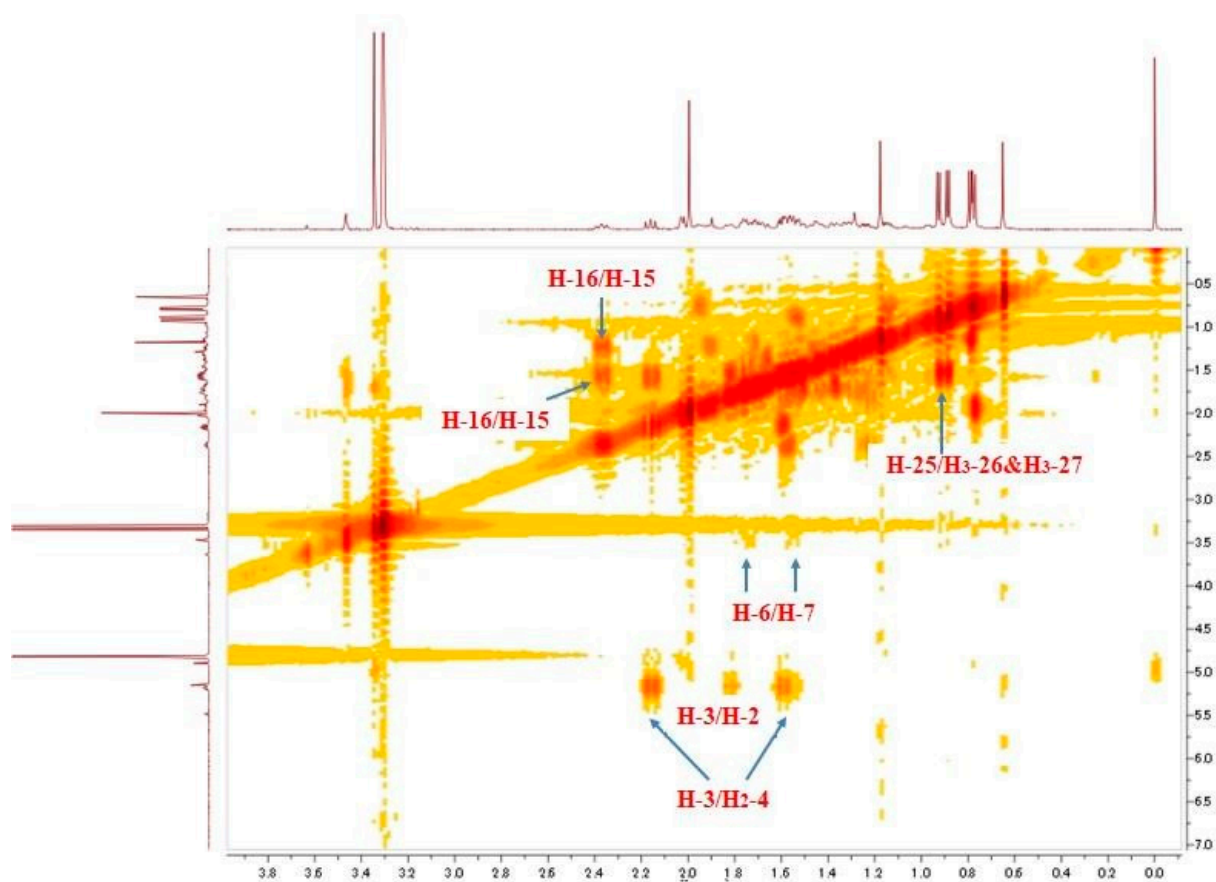

**Figure S17.** Expanded  $^1\text{H}$ - $^1\text{H}$  COSY spectrum of compound **4** ( $\text{CD}_3\text{OD}$ ).

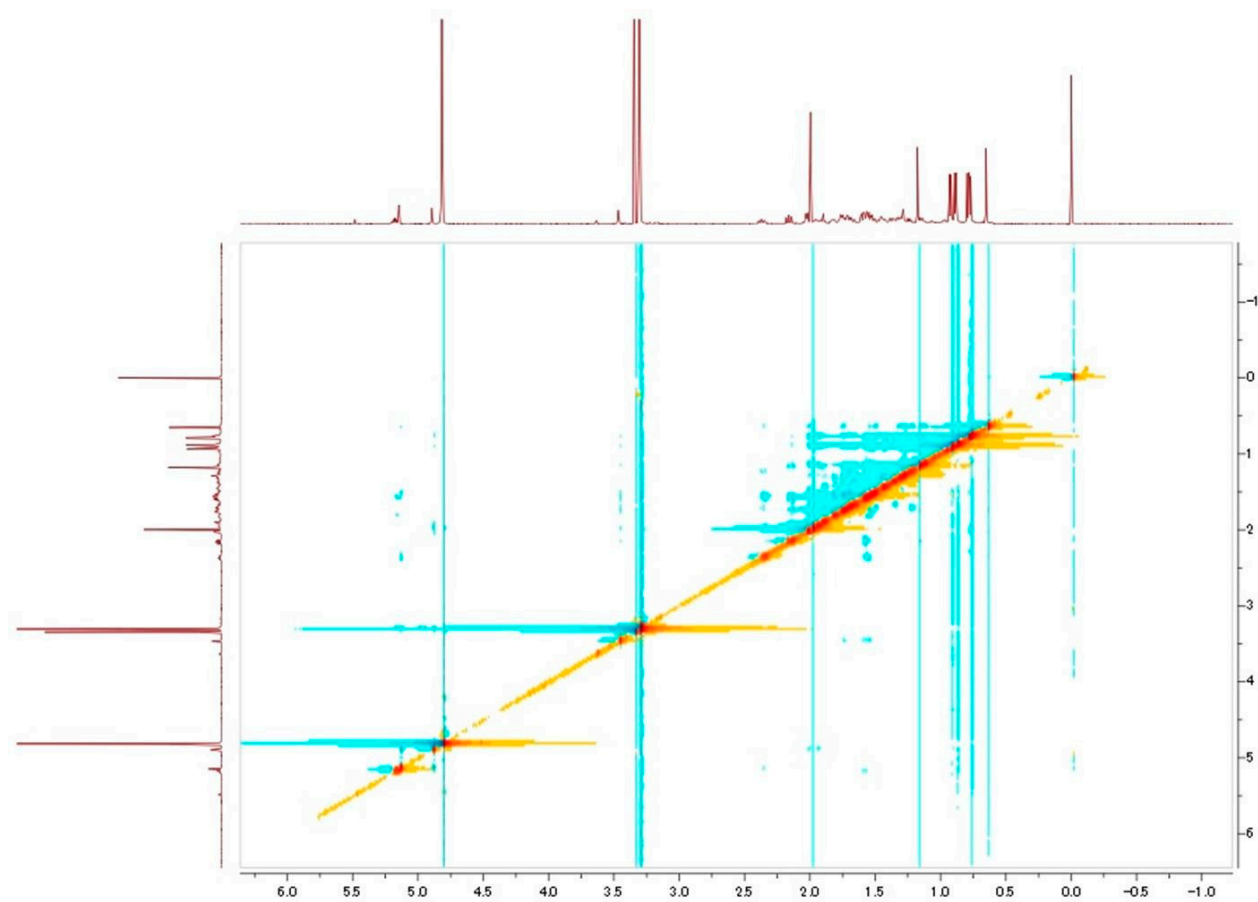

**Figure S18.** NOESY spectrum of compound **4** (CD<sub>3</sub>OD).



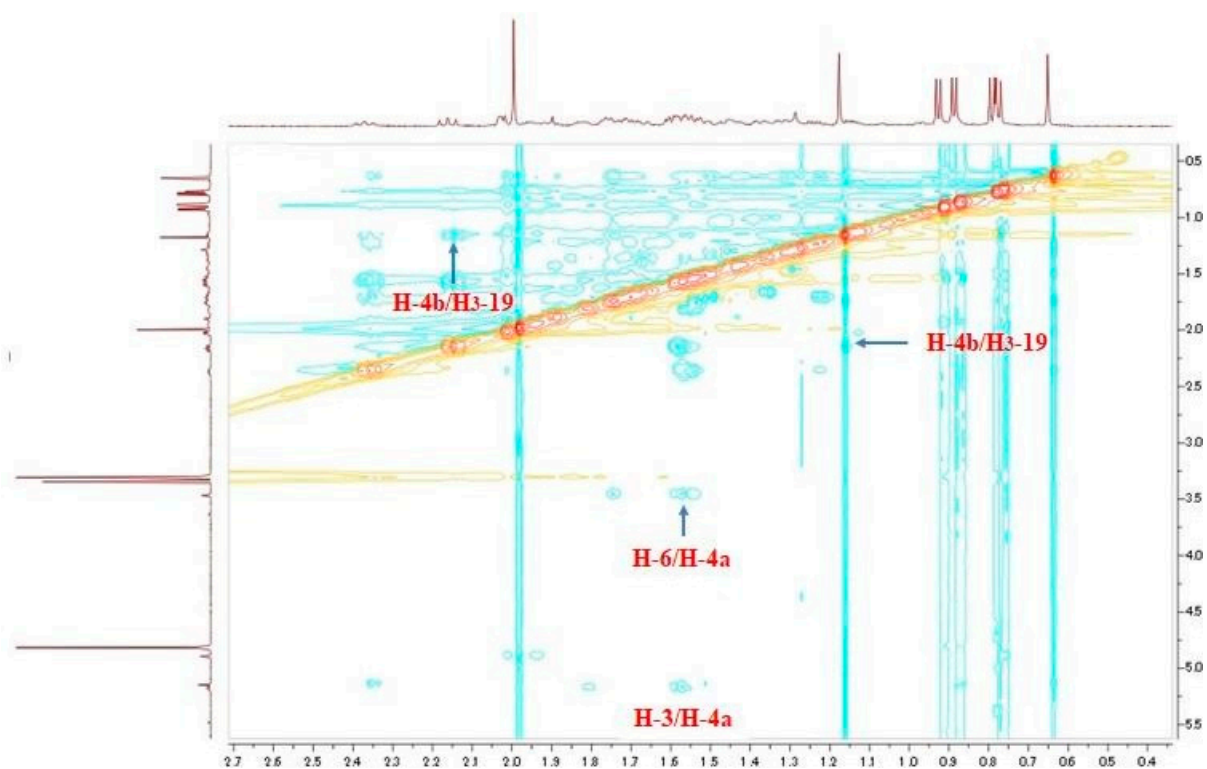

**Figure S19.** Expanded NOESY spectrum of compound **4** (CD<sub>3</sub>OD).

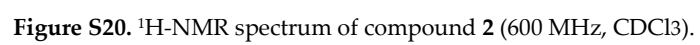

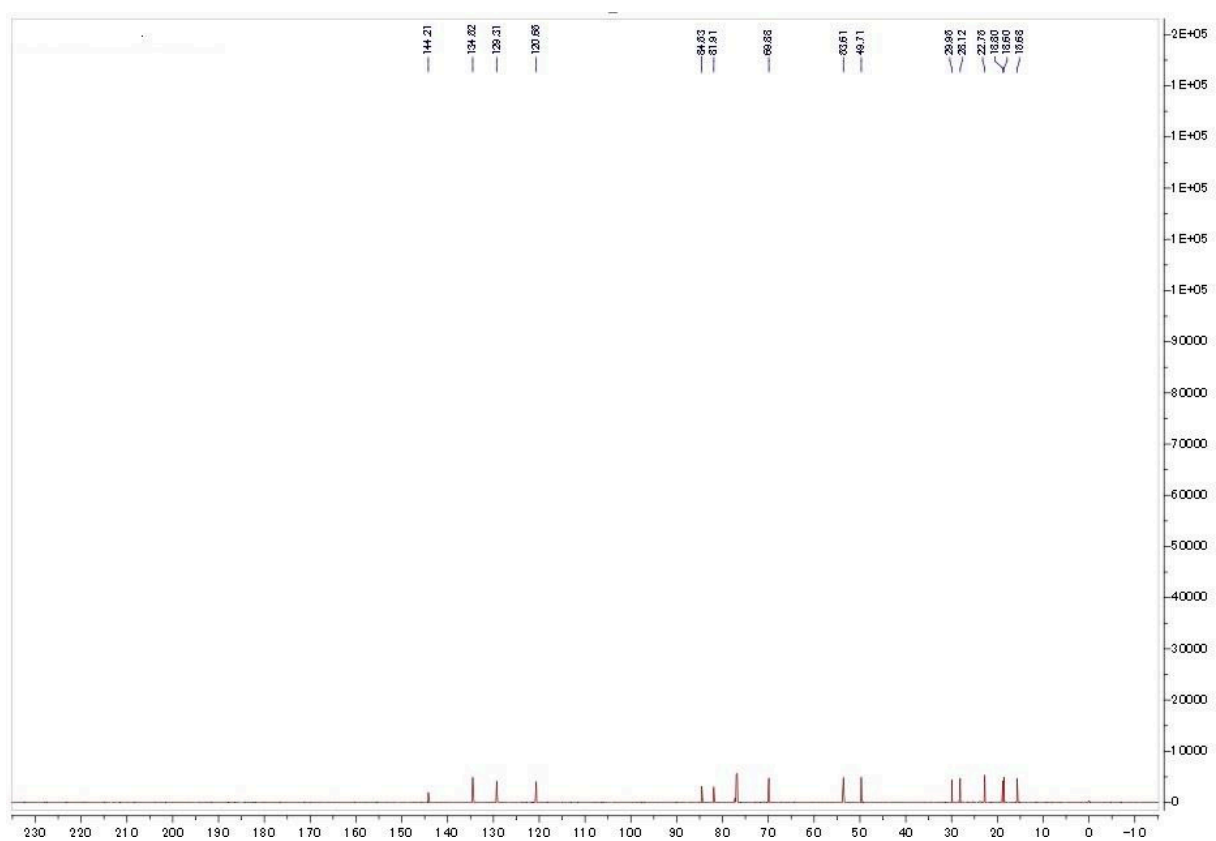

**Figure S21.**  $^{13}\text{C}$ -NMR spectrum of compound 2 (150 MHz,  $\text{CDCl}_3$ ).

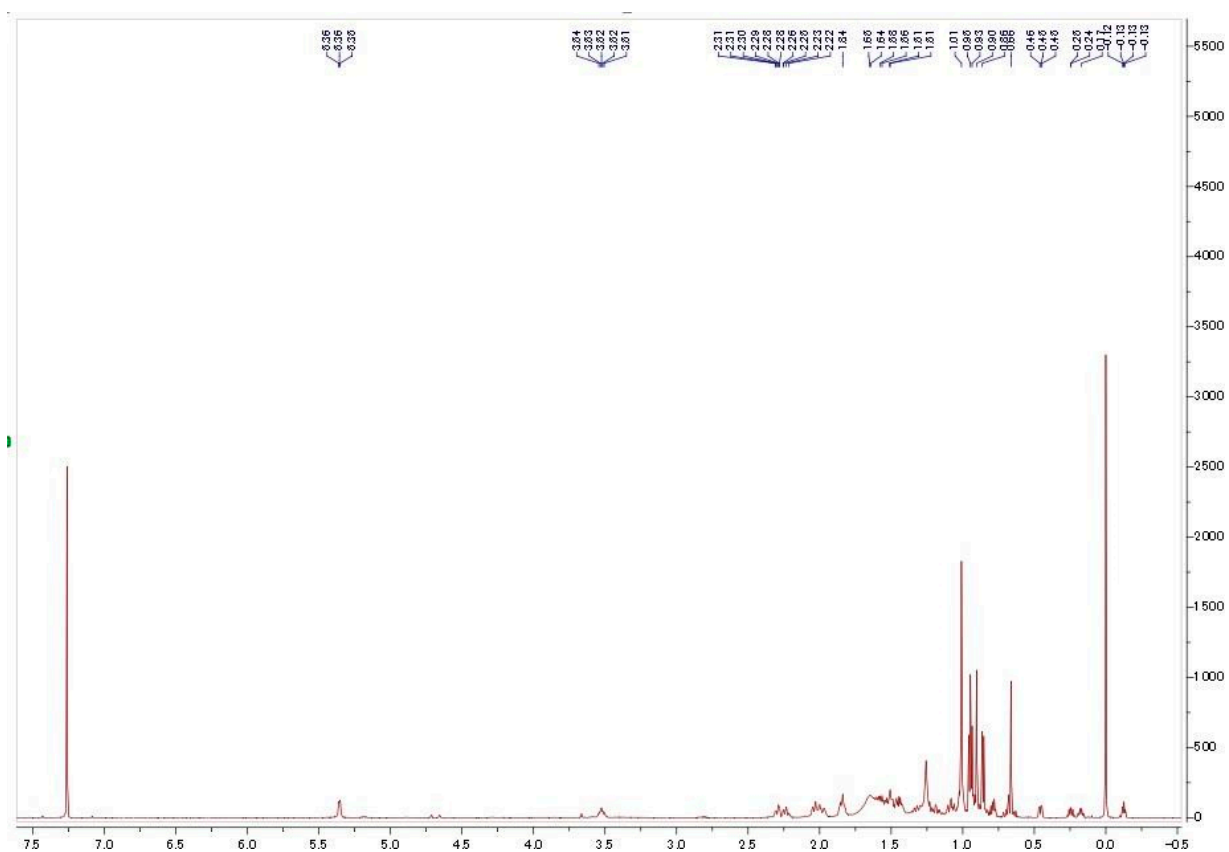

**Figure S22.**  $^1\text{H}$ -NMR spectrum of compound 3 (600 MHz,  $\text{CDCl}_3$ ).

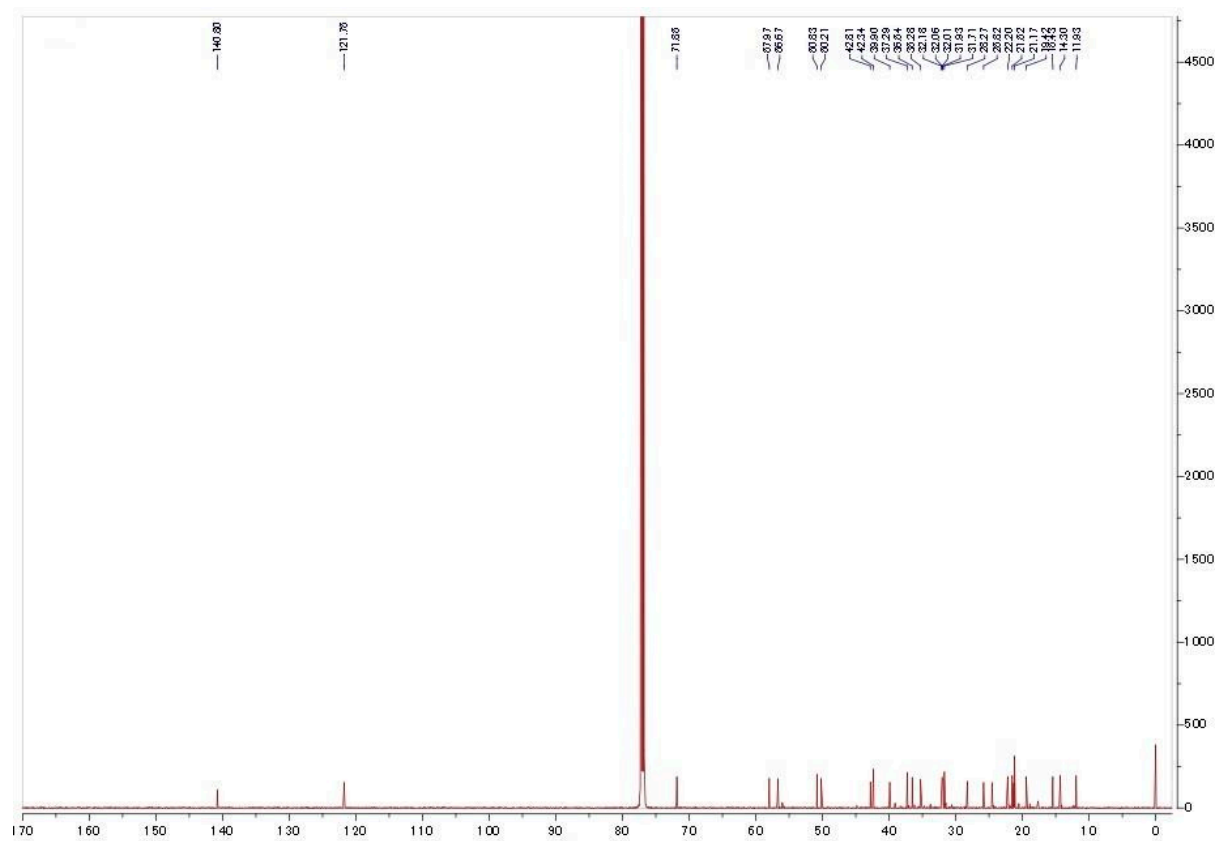

**Figure S23.** <sup>13</sup>C-NMR spectrum of compound **3** (150 MHz, CDCl<sub>3</sub>).

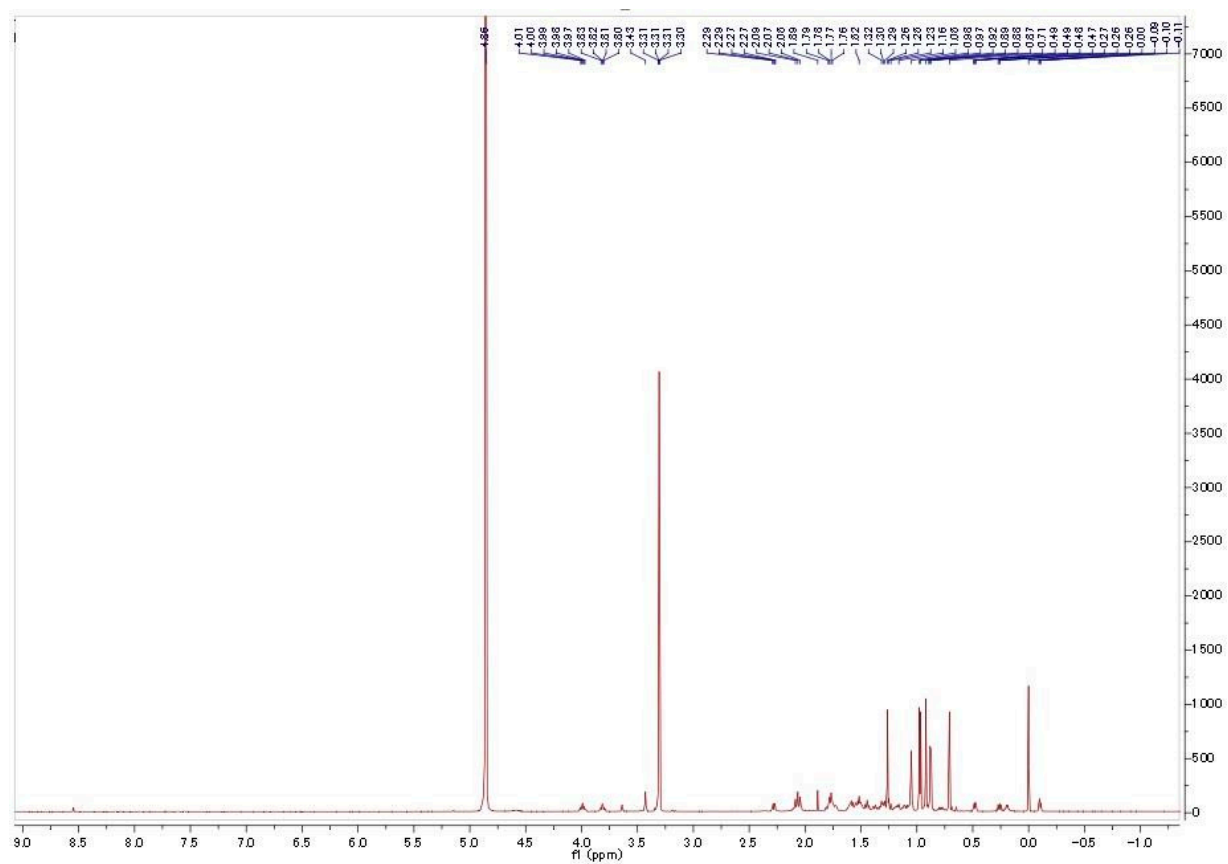

**Figure S24.**  $^1\text{H}$ -NMR spectrum of compound 5 (600 MHz,  $\text{CD}_3\text{OD}$ ).

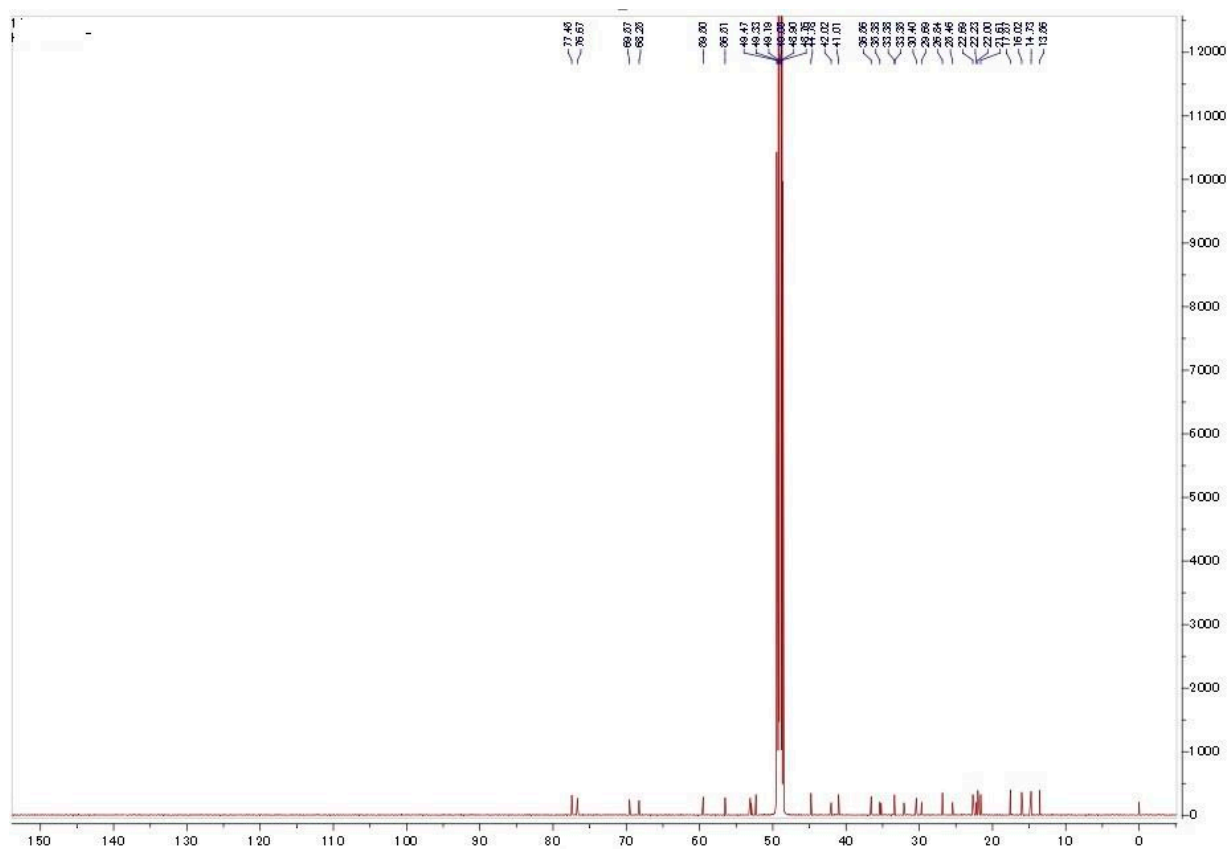

**Figure S25.**  $^{13}\text{C}$ -NMR spectrum of compound 5 (150 MHz,  $\text{CD}_3\text{OD}$ ).

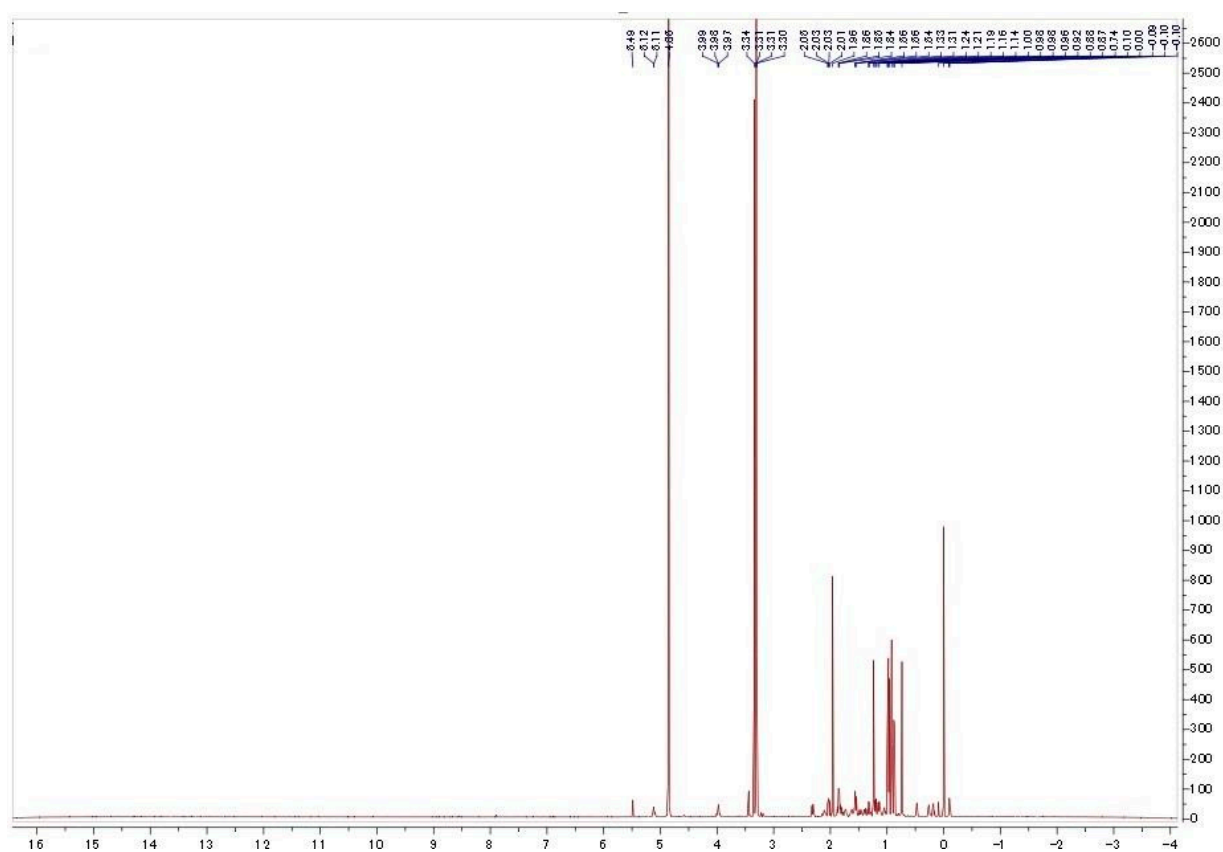

**Figure S26.**  $^1\text{H}$ -NMR spectrum of compound **6** (600 MHz,  $\text{CD}_3\text{OD}$ ).



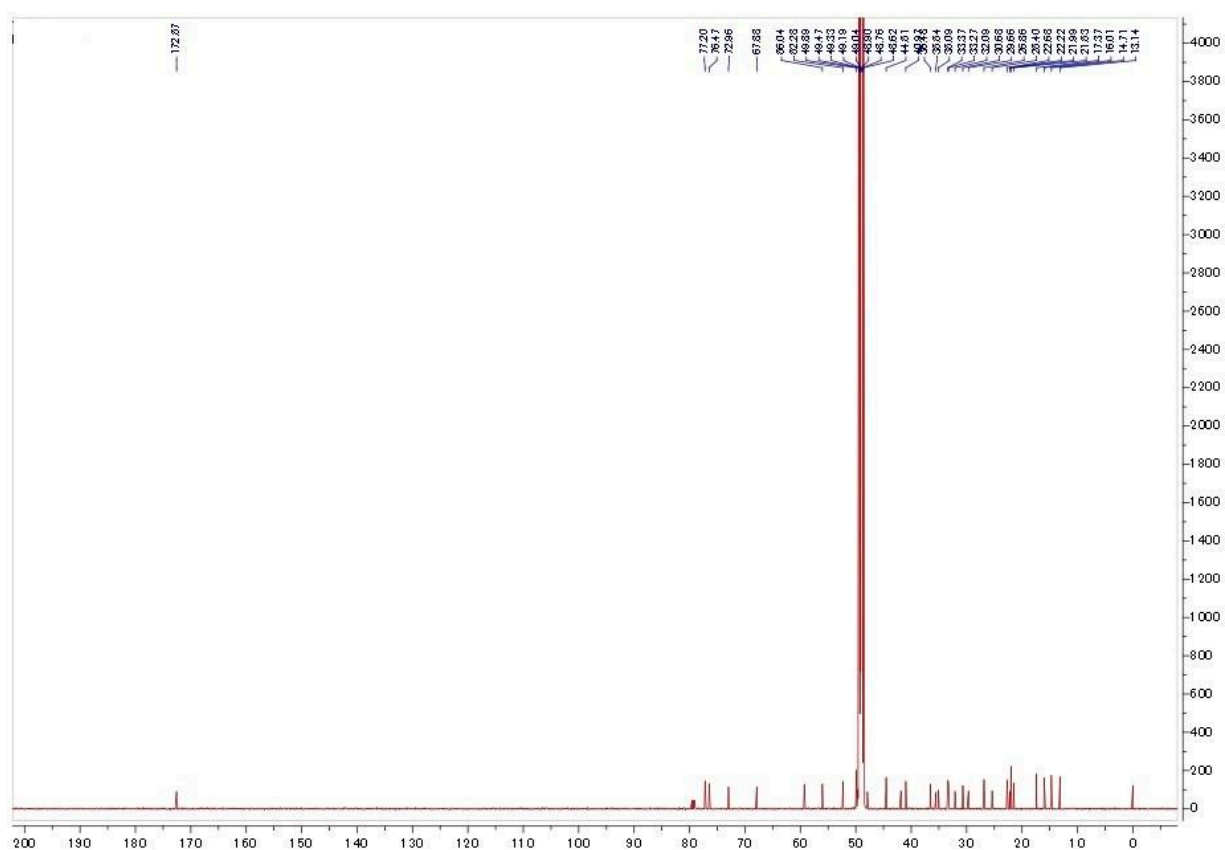

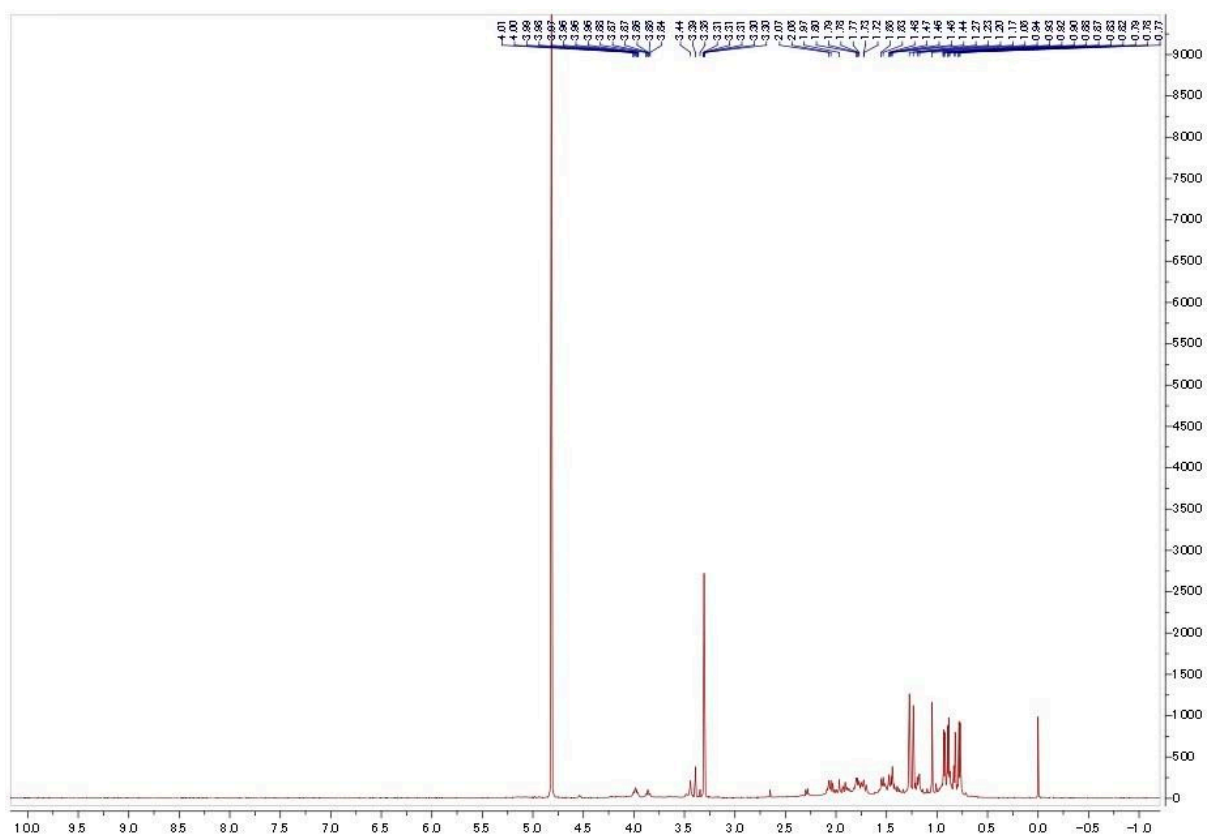

**Figure S28.**  $^1\text{H}$ -NMR spectrum of compound 7 (600 MHz,  $\text{CD}_3\text{OD}$ ).

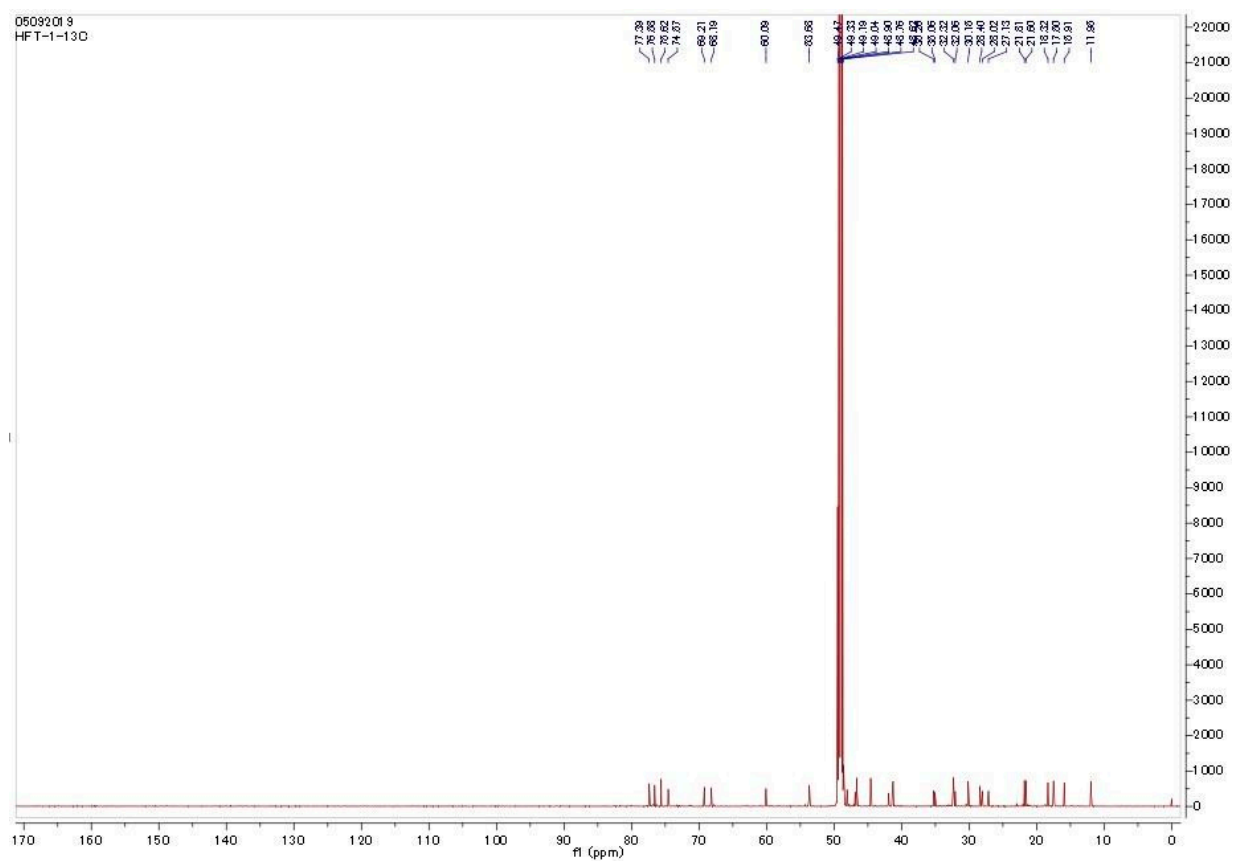

**Figure S29.**  $^{13}\text{C}$ -NMR spectrum of compound **7** (150 MHz,  $\text{CD}_3\text{OD}$ ).

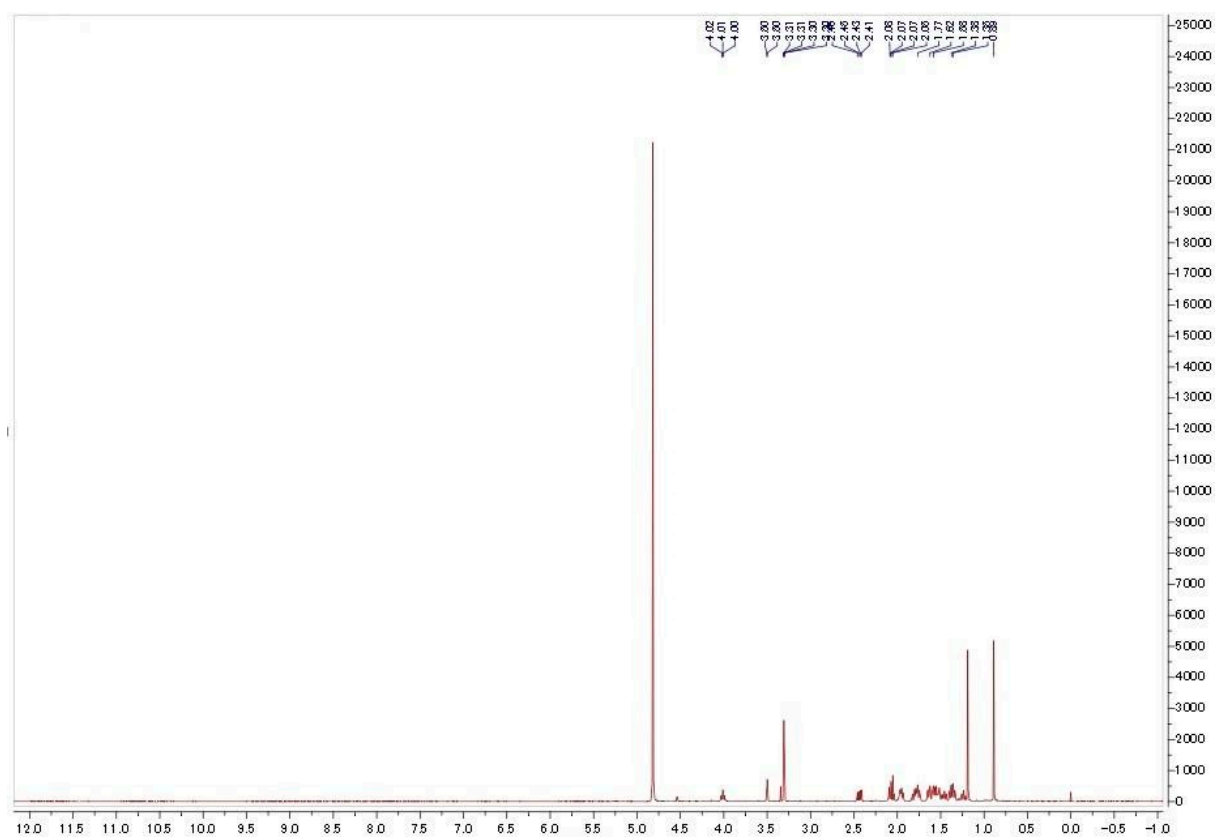

**Figure S30.**  $^1\text{H}$ -NMR spectrum of compound **8** (600 MHz,  $\text{CD}_3\text{OD}$ ).

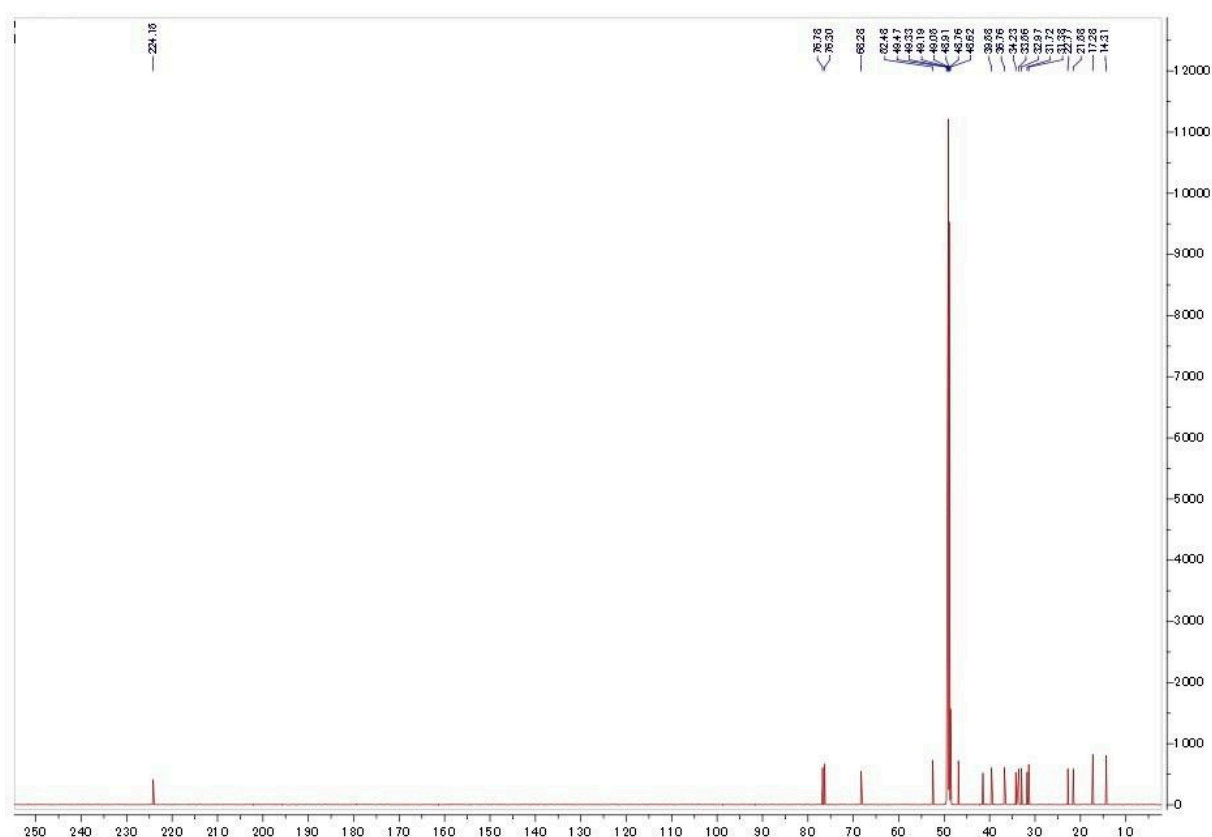

**Figure S31.**  $^{13}\text{C}$ -NMR spectrum of compound **8** (150 MHz,  $\text{CD}_3\text{OD}$ ).

**Table S4.** All SARS CoV-2 related proteins used in this study.

| Protein                                        | Name                   | Function                                                                                                             | PDB Code                       |
|------------------------------------------------|------------------------|----------------------------------------------------------------------------------------------------------------------|--------------------------------|
| <b>Viral Proteins (Nonstructural proteins)</b> |                        |                                                                                                                      |                                |
| nsp1                                           | -                      | Host translation inhibitor                                                                                           | 7K3N                           |
| nsp2                                           | -                      | Play a role in the modulation of host cell survival signaling pathway by interacting with host PHB and PHB2          | Deposited model in Swiss-Model |
| nsp3                                           | ADP ribose phosphatase | Activate replicase polyprotein                                                                                       | 6W02                           |
| nsp4                                           | -                      | Participates in the assembly of virally-induced cytoplasmic double-membrane vesicles necessary for viral replication | Deposited model in Swiss-Model |
| nsp5 (3CL-PRO)                                 | Main protease          | Cleaves the C-terminus of replicase polyprotein at 11 sites                                                          | 6lu7                           |
| nsp6                                           | -                      | Plays a role in the initial induction of autophagosomes                                                              | Deposited model in Swiss-Model |
| nsp7                                           | -                      | Plays a role in viral RNA synthesis                                                                                  | 6M5I                           |
| nsp8                                           | -                      | Plays a role in viral RNA synthesis                                                                                  | 6M5I                           |
| nsp9                                           | -                      | May participate in viral replication by acting as a ssRNA-binding protein                                            | 6WC1                           |
| nsp10                                          | -                      | plays an essential role in viral mRNAs cap methylation                                                               | 6ZPE                           |
| nsp11 (PL-PRO)                                 | Papain-like protease   | Participate in the activation of the replicase polyprotein                                                           | 6WX4                           |

|                            |                                     |                                                                                                                                                                                                               |                                |
|----------------------------|-------------------------------------|---------------------------------------------------------------------------------------------------------------------------------------------------------------------------------------------------------------|--------------------------------|
| nsp12 (Pol; RdRP)          | RNA-directed RNA polymerase         | Responsible for replication and transcription of the viral RNA genome                                                                                                                                         | 6M71                           |
| nsp13 (Hel)                | Helicase                            | Displaying RNA and DNA duplex-unwinding activities with 5' to 3' polarity. Activity of helicase is dependent on magnesium                                                                                     | 5RL6                           |
| nsp14 (ExoN)               | Proofreading exoribonuclease        | An exoribonuclease activity acting on both ssRNA and dsRNA in a 3' to 5' direction                                                                                                                            | Deposited model in Swiss-Model |
| Nsp15 (NendoU)             | Uridylate-specific endoribonuclease | Mn(2+)-dependent, uridylate-specific enzyme, which leaves 2'-3'-cyclicphosphates 5' to the cleaved bond.                                                                                                      | 5S6X                           |
| nsp16                      | 2'-O-methyltransferase              | Methyltransferase that mediates mRNA cap 2'-O-ribose methylation to the 5'-cap structure of viral mRNAs                                                                                                       | 6W4H                           |
| <b>Structural proteins</b> |                                     |                                                                                                                                                                                                               |                                |
| S glycoprotein             | Spike glycoprotein                  | Binding to human ACE2 receptor and internalization of the virus into the endosomes of the host cell induces conformational changes in the Spike glycoprotein                                                  | 6lzg and 6zb5                  |
| E-protein                  | Envelope small membrane protein     | Plays a central role in virus morphogenesis and assembly                                                                                                                                                      | 7k3g                           |
| M-protein                  | Membrane protein                    | Component of the viral envelope that plays a central role in virus morphogenesis and assembly via its interactions with other viral proteins                                                                  | Deposited model in Swiss-Model |
| N-protein                  | Nucleoprotein                       | Packages the positive strand viral genome RNA into a helical ribonucleocapsid (RNP) and plays a fundamental role during virion assembly through its interactions with the viral genome and membrane protein M | 6M3M                           |
| <b>Accessory Proteins</b>  |                                     |                                                                                                                                                                                                               |                                |
| ORF3a                      | ORF3a protein                       | Forms homotetrameric potassium sensitive ion channels (viroporin) and may modulate virus release                                                                                                              | 6XDC                           |
| ORF6                       | ORF6 protein                        | Disrupts cell nuclear import complex formation by tethering karyopherin alpha 2 and karyopherin beta 1 to the membrane                                                                                        | Deposited model in Swiss-Model |

| ORF7a                  | ORF7a protein                       | Plays a role as antagonist of host tetherin (BST2), disrupting its antiviral effect                                                                                                                                                                             | 6w37                           |
|------------------------|-------------------------------------|-----------------------------------------------------------------------------------------------------------------------------------------------------------------------------------------------------------------------------------------------------------------|--------------------------------|
| ORF7b                  | ORF7b protein                       | -                                                                                                                                                                                                                                                               | -                              |
| ORF8                   | ORF8 protein                        | May play a role in host-virus interaction                                                                                                                                                                                                                       | 7JTL                           |
| ORF9b                  | ORF9b protein                       | Plays a role in the inhibition of host innate immune response by targeting the mitochondrial-associated adapter MAVS                                                                                                                                            | 6Z4U                           |
| Human-derived Proteins |                                     |                                                                                                                                                                                                                                                                 |                                |
| ACE2                   | Angiotensin converting enzyme 2     | Responsible for attachment of SARS CoV                                                                                                                                                                                                                          | 6LZG                           |
| Furin                  | Furin                               | Activation of S-protein                                                                                                                                                                                                                                         | 6EQX                           |
| TMPRSS2                | Transmembrane protease, serine 2    | Activation of S-protein                                                                                                                                                                                                                                         | Deposited model in Swiss-Model |
| CatL                   | Cathepsin L                         | Activation of S-protein                                                                                                                                                                                                                                         | 2YJC                           |
| NPR1                   | Neuropilin 1                        | Facilitates viral entry                                                                                                                                                                                                                                         | 3i97                           |
| PHB1                   | Prohibitin sub-unit1                | In the mitochondria, together with PHB2, forms large ring complexes (prohibitin complexes) in the inner mitochondrial membrane (IMM) and functions as chaperone protein that stabilizes mitochondrial respiratory enzymes and maintains mitochondrial integrity | Deposited model in Swiss-Model |
| PHB2                   | Prohibitin sub-unit2                | In the mitochondria, together with PHB2, forms large ring complexes (prohibitin complexes) in the inner mitochondrial membrane (IMM) and functions as chaperone protein that stabilizes mitochondrial respiratory enzymes and maintains mitochondrial integrity | Deposited model in Swiss-Model |
| AAK1                   | Adaptor Protein 2 Associated Kinase | Participate in viral endocytosis                                                                                                                                                                                                                                | 4WSQ                           |
| GAK                    | Cyclin-G associated kinase          | Participate in viral endocytosis                                                                                                                                                                                                                                | 4y8d                           |

**Table S5.** Docking scores of the isolated compounds (1–8) against the SARS CoV-2 targets expressed in kcal/mol.

| Protein                       | 1     | 2     | 3     | 4            | 5     | 6     | 7            | 8            |
|-------------------------------|-------|-------|-------|--------------|-------|-------|--------------|--------------|
| nsp1                          | -7.36 | -5.23 | -4.38 | -3.78        | -6.98 | -3.56 | -4.26        | -6.36        |
| nsp2                          | -5.34 | -6.31 | -6.42 | -5.29        | -4.27 | -3.84 | -6.19        | -7.36        |
| nsp3                          | -5.39 | -6.22 | -5.92 | -7.34        | -7.88 | -7.23 | -6.32        | -7.13        |
| nsp4                          | -5.29 | -7.44 | -4.23 | -7.66        | -6.95 | -7.39 | -7.29        | -7.48        |
| <b>nsp5 (M<sup>pro</sup>)</b> | -4.55 | -6.45 | -7.73 | <b>-8.85</b> | -7.28 | -7.42 | <b>-8.91</b> | <b>-9.43</b> |
| nsp6                          | -6.67 | -6.43 | -6.94 | -5.83        | -5.28 | -5.29 | -5.11        | -7.38        |
| nsp7                          | -7.33 | -6.29 | -7.27 | -6.62        | -7.21 | -7.73 | -7.27        | -6.22        |
| nsp8                          | -5.19 | -6.37 | -6.44 | -7.28        | -7.11 | -7.37 | -6.29        | -5.57        |
| nsp9                          | -7.44 | -6.44 | -7.16 | -6.29        | -6.11 | -6.38 | -6.39        | -5.39        |
| nsp10                         | -5.28 | -5.39 | -5.88 | -6.39        | -5.33 | -5.22 | -7.28        | -7.39        |
| nsp11 (PL-PRO)                | -6.65 | -6.33 | -7.98 | -6.33        | -6.23 | -7.44 | -5.34        | -7.54        |
| nsp12 (Pol; RdRP)             | -6.45 | -7.44 | -6.35 | -7.39        | -6.45 | 6.39  | -5.44        | -6.32        |
| nsp13 (Hel)                   | -5.29 | -6.32 | -7.39 | -5.55        | -7.29 | -6.77 | -5.28        | -5.39        |
|                               | -5.16 | -7.18 | -7.42 | -7.49        | -6.69 | -6.99 | -7.17        | -7.38        |

|                |       |       |       |       |       |       |       |       |
|----------------|-------|-------|-------|-------|-------|-------|-------|-------|
| nsp14 (ExoN)   |       |       |       |       |       |       |       |       |
| Nsp15 (NendoU) | -5.02 | -6.05 | -7.12 | -5.28 | -7.02 | -6.5  | -5.01 | -5.12 |
| nsp16          | -4.89 | -6.91 | -7.15 | -7.22 | -6.42 | -6.72 | -6.9  | -7.11 |
| S glycoprotein | -6.18 | -7.17 | -6.08 | -7.12 | -6.18 | 6.66  | -5.17 | -6.05 |
| E-protein      | -6.38 | -6.06 | -7.71 | -6.06 | -5.96 | -7.17 | -5.07 | -7.27 |
| M-protein      | -5.01 | -5.12 | -5.61 | -6.12 | -5.06 | -4.95 | -7.01 | -7.12 |
| N-protein      | -7.17 | -6.17 | -6.89 | -6.02 | -5.84 | -6.11 | -6.12 | -5.12 |
| ORF3a          | -4.92 | -6.1  | -6.17 | -7.01 | -6.84 | -7.1  | -6.02 | -5.3  |
| ORF6           | -7.06 | -6.02 | -7    | -6.35 | -6.94 | -7.46 | -7    | -5.95 |
| ORF7a          | -6.4  | -6.16 | -6.67 | -5.56 | -5.01 | -5.02 | -4.84 | -7.11 |
| ORF7b          | -5.02 | -7.17 | -3.96 | -7.39 | -6.68 | -7.12 | -7.02 | -7.21 |
| ORF8           | -5.12 | -5.95 | -5.65 | -7.07 | -7.61 | -6.96 | -6.05 | -6.86 |
| ORF9b          | -5.07 | -6.04 | -6.15 | -5.02 | -4    | -3.57 | -5.92 | -7.09 |
| ACE2           | -7.04 | -4.96 | -4.11 | -3.51 | -6.71 | -3.29 | -3.99 | -6.09 |
| Furin          | -4.75 | -5.78 | -6.85 | -5.01 | -6.75 | -6.23 | -4.74 | -4.85 |
| TMPRSS2        | -4.62 | -6.64 | -6.88 | -6.95 | -6.15 | -6.45 | -6.63 | -6.84 |
| CatL           | -6.9  | -5.9  | -6.62 | -5.75 | -5.57 | -5.84 | -5.85 | -4.85 |
| NPR1           | -4.85 | -5.68 | -5.38 | -6.8  | -7.34 | -6.69 | -5.78 | -6.59 |
| PHB1           | -6.77 | -4.69 | -3.84 | -3.24 | -6.44 | -3.02 | -3.72 | -5.82 |
| PHB2           | -4.75 | -5.78 | -6.85 | -5.01 | -6.75 | -6.23 | -4.74 | -4.85 |
| AAK1           | -6.42 | -6.88 | -5.33 | -4.16 | -6.33 | -7.29 | -6.97 | -5.23 |
| <b>GAK</b>     | -5.53 | -6.87 | -9.26 | -8.37 | -8.68 | -6.44 | -7.23 | -9.45 |

## 1. Docking and Molecular Dynamic Simulation

### 1.1. Molecular Docking

Auto Dock Vina software was used in all molecular docking experiments [1]. All isolated compounds were docked against the Mpro crystal structure (PDB codes: 7L0D) [2]. The binding site was determined according to the enzyme's co-crystallized ligand. The co-ordinates of the grid box were: x = -12.87; y = 16.3; z = 68.64. The size of the grid box was set to be 15 Å. Exhaustiveness was set to be 24. Ten poses were generated for each docking experiment [3,4]. Docking poses were analyzed and visualized using Pymol software [1].

### 1.2. Molecular Dynamics Simulation

Desmond v. 2.2 software was used for performing MDS experiments [5-7]. This software applies the OPLS-2005 force field. Protein systems were built using the System Builder option, where the protein structure was checked for any missing hydrogens, the protonation states of the amino acid residues were set (pH = 7.4), and the co-crystallized water molecules were removed. Thereafter, the whole structure was embedded in an orthorhombic box of TIP3P water together with 0.15 M Na<sup>+</sup> and Cl<sup>-</sup> ions in 20 Å solvent buffer. Afterward, the prepared systems were energy minimized and equilibrated for 10 ns. For protein-ligand complexes, the top-scoring poses were used as a starting point for simulation. Desmond software automatically parameterizes inputted ligands during the system building step according to the OPLS forcefield. For simulations performed by NAMD 2.9.1 [8], the protein structures were built and optimized by using the QwikMD toolkit of the VMD software. The parameters and topologies of the compounds were calculated using the Charmm27 force field with the online software Ligand Reader and Modeler (<http://www.charmm-gui.org/?doc=input/ligandrm>, accessed on 22 May 2022) [9]. Afterward, the generated parameters and topology files were loaded to VMD to



readily read the protein–ligand complexes without errors and then conduct the simulation step.

### 1.3. Absolute binding Free energy calculation

Binding free energy calculations ( $\Delta G$ ) were performed using the free energy perturbation (FEP) method [9]. This method was described in detail in the recent article by Kim and coworkers [9]. Briefly, this method calculates the binding free energy  $\Delta G_{\text{binding}}$  according to the following equation:

$$\Delta G_{\text{binding}} = \Delta G_{\text{Complex}} - \Delta G_{\text{Ligand}} \quad (1)$$

The value of each  $\Delta G$  is estimated from a separate simulation using NAMD software. All input files required for simulation by NAMD can be prepared by using the online website Charmm-GUI (<https://charmm-gui.org/?doc=input/afes.abinding>). Subsequently, we can use these files in NAMD to produce the required simulations using the FEP calculation function in NAMD 2.9.1. The equilibration (5 ns long) was achieved in the NPT ensemble at 300 K and 1 atm (1.01325 bar) with Langevin piston pressure (for “Complex” and “Ligand”) in the presence of the TIP3P water model. Then, 10 ns FEP simulations were performed for each compound, and the last 5 ns of the free energy values was measured for the final free energy values [9]. Finally, the generated trajectories were visualized and analyzed using VMD software. It worth noting that Ngo and co-workers in their recent benchmarking study found that the FEP method of determination of  $\Delta G$  was the most accurate method in predicting  $M^{\text{Pro}}$  inhibitors [10].

In regard to Molecular Mechanics-Generalized Born Surface Area (MMGBSA) and Molecular Mechanics Poisson-Boltzmann Surface Area (MMPBSA) embedded in the MMPBSA.py module of AMBER18 were utilised to calculate the binding free energy of the docked complex [11]. 100 frames were processed from the trajectories in total, and the system's net energy was estimated using the following equation:

$$\Delta G_{\text{Binding}} = \Delta G_{\text{Complex}} - \Delta G_{\text{Receptor}} - \Delta G_{\text{Inhibitor}} \quad (2)$$

Each of the aforementioned terms requires the calculation of multiple energy components, including van der Waals energy, electrostatic energy, internal energy from molecular mechanics, and polar contribution to solvation energy

## References

- Seeliger, D.; de Groot, B.L. Ligand docking and binding site analysis with PyMOL and Autodock/Vina. *J. Comput. Aided Mol. Des.* 2010, 24, 417–422.
- Clyde, A.; Galanie, S.; Kneller, D. W.; Ma, H.; Babuji, Y.; Blaiszik, B.; ... & Stevens, R. (2021). High Throughput Virtual Screening and Validation of a SARS-CoV-2 Main Protease Non-Covalent Inhibitor. *bioRxiv*.
- Sayed, A.M.; Alhadrami, H.A.; El-Gendy, A.O.; Shamikh, Y.I.; Belbahri, L.; Hassan, H.M.; Abdelmohsen, U.R.; Rateb, M.E. Microbial natural products as potential inhibitors of SARS-CoV-2 main protease (Mpro). *Microorganisms* 2020, 8, 970.
- Amaro, R.E.; Baudry, J.; Chodera, J.; Demir, Ö.; McCammon, J.A.; Miao, Y.; Smith, J.C. Ensemble docking in drug discovery. *Biophys. J.* 2018, 114, 2271–2278.
- Bowers, K.J.; Chow, D.E.; Xu, H.; Dror, R.O.; Eastwood, M.P.; Gregersen, B.A.; Klepeis, J.L.; Kolossvary, I.; Moraes, M.A.; Sacerdoti, F.D.; et al. Scalable algorithms for molecular dynamics simulations on commodity clusters. In *Proceedings of the SC'06: Proceedings of the 2006 ACM/IEEE Conference on Supercomputing*, Tampa, FL, USA, 11–17 November 2006; IEEE: New York, NY, USA, 2006; p. 43.
- Release, S. 3: Desmond Molecular Dynamics System, DE Shaw Research, New York, NY, 2017; Maestro-Desmond Interoperability Tools, Schrödinger: New York, NY, USA, 2017.
- Schrodinger LLC. Maestro, Version 9.0; Schrodinger LLC: New York, NY, USA, 2009.
- Phillips, J.C.; Braun, R.; Wang, W.; Gumbart, J.; Tajkhorshid, E.; Villa, E.; Chipot, C.; Skeel, R.D.; Kalé, L.; Schulten, K. Scalable molecular dynamics with NAMD. *J. Comput. Chem.* 2005, 26, 1781–1802.
- Kim, S.; Oshima, H.; Zhang, H.; Kern, N.R.; Re, S.; Lee, J.; Rous, B.; Sugita, Y.; Jiang, W.; Im, W. CHARMM-GUI free energy calculator for absolute and relative ligand solvation and binding free energy simulations. *J. Chem. Theory Comput.* 2020, 16, 7207–7218.

10. Ngo, S.T.; Tam, N.M.; Quan, P.M.; Nguyen, T.H. Benchmark of Popular Free Energy Approaches Revealing the Inhibitors Binding to SARS-CoV-2 Mpro. *J. Chem. Inf. Model.* 2021, 61, 2302–2312.
11. Miller III, B. R., McGee Jr, T. D., Swails, J. M., Homeyer, N., Gohlke, H., & Roitberg, A. E. (2012). MMPBSA. py: an efficient program for end-state free energy calculations. *Journal of chemical theory and computation*, 8(9), 3314–3321.
